Comparative spring mechanics in mantis shrimp

S. N. Patek\*, M. V. Rosario\* and J. R. A. Taylor<sup>†</sup>

\*Department of Biology, Organismic and Evolutionary Graduate Program, University of Massachusetts  
Amherst, MA 01003 U.S.A.

<sup>†</sup>Department of Biology, Indiana University-Purdue University, Fort Wayne, IN 46805-1499 U.S.A.

Corresponding author:

S. N. Patek

Department of Biology

University of Massachusetts

Amherst, MA 01003 U.S.A.

Telephone: (413) 577-4426

Fax: (413) 545-3243

Email: [patek@bio.umass.edu](mailto:patek@bio.umass.edu)

## ABSTRACT

Elastic mechanisms are fundamental to fast and efficient movements. Mantis shrimp power their fast raptorial appendages using a conserved network of exoskeletal springs, linkages and latches. Their appendages are fantastically diverse - ranging from spears to hammers. We measured the spring mechanics of 12 mantis shrimp species from 5 different families exhibiting hammer-shaped, spear-shaped and undifferentiated appendages. Across species, spring force and work increase with size of the appendage and spring stiffness is not correlated with size. Species that hammer their prey exhibit significantly greater spring resilience compared to species that impale evasive prey (i.e., “spearers”); mixed statistical results show that species that hammer prey also produce greater work relative to size during spring loading compared to spearers. Disabling part of the spring mechanism, the “saddle”, significantly decreases spring force and work in three smasher species; cross-species analyses show a greater effect of cutting the saddle on the spring force and stiffness in species without hammers compared to species with hammers. Overall, the study shows a more potent spring mechanism in the faster and more powerful hammering species compared to spearing species while also highlighting the challenges of reconciling within-species and cross-species mechanical analyses when different processes may be acting at these two different levels of analysis. The observed mechanical variation in spring mechanics provides insights into the evolutionary history, morphological components and mechanical behavior that were not discernible in prior single-species studies. The results also suggest that, even with a conserved spring mechanism, spring behavior, potency and component structures can be varied within a clade with implications for the behavioral functions of power-amplified devices.

Key words: Stomatopoda, spring, force, biomechanics, predation

## INTRODUCTION

25  
26  
27 Elastic mechanisms are the biomechanical foundation for rapid and efficient organismal  
28 movements. The extraordinary efficiency of kangaroo hopping (Alexander, 1988; Alexander and  
29 Vernon, 1975), the extreme accelerations of cellular jellyfish stingers (Nüchter et al., 2006), and  
30 the tremendous speeds of termite jaws, trap-jaw ant mandibles and snapping shrimp appendages  
31 (Lohse et al., 2001; Patek et al., 2006; Seid et al., 2009; Spagna et al., 2008; Versluis et al., 2000)  
32 are all driven by the storage and rapid release of elastic potential energy. The field of elastic  
33 biomechanics is rich with analyses of the energetics, mechanics and material behavior of these  
34 spring-based systems (Alexander, 1988; Alexander, 2003; Patek et al., 2011; Roberts and Azizi,  
35 2011; Vogel, 2005; Wainwright et al., 1976), yet there is far less understanding of how these  
36 systems have been modified over evolutionary history to achieve the remarkably diverse  
37 functions that are in evidence today. The goal of this study is to test how mechanical spring  
38 parameters co-vary across species, specifically through a phylogeny-based comparative analysis  
39 of the elastic feeding mechanism in mantis shrimp (Crustacea: Stomatopoda).

40 Comparative studies of elastic systems show substantial variation in elastic mechanisms  
41 and behavior. Comparisons of wallabies and kangaroos reveal that elastic properties such as  
42 safety factors and energy storage may correlate with habitat features (McGowan et al., 2008b);  
43 for example, wallabies that hop rapidly in open habitats store substantially more elastic strain  
44 energy in their tendons than do wallabies that maneuver over steep, rocky cliffs (McGowan et  
45 al., 2008a). A comparison of pigeon and owl feathers reveals that the flexibility of feather shafts  
46 is more greatly impacted by the second moment of area than by changes in Young's modulus  
47 (Bachmann et al., 2012). Two elastic seed dispersers - bittercress (Brassicaceae, *Cardamine*  
48 *parviflora*) and jewelweed (Balsaminaceae, *Impatiens capensis*) - use elastic energy stored in the

49 seed pods' valves to explosively collapse while releasing the seeds (Hayashi et al., 2009). Their  
50 elastic energy transfer and efficiency was compared and the distance disperser (*C. parviflora*)  
51 has greater dispersal distance and efficiency than *I. capensis* although the actual spatial pattern of  
52 dispersal is not significantly different between these two species (Hayashi et al., 2009; Hayashi  
53 et al., 2010). A comparative study of six arachnid species shows that elastic behavior of  
54 arachnid legs is achieved through morphological changes, specifically by shifting the  
55 configurations of elastic transarticular sclerites and internal pressure (Sensenig and Schultz,  
56 2004; Sensenig and Shultz, 2003). Thus, organisms vary elastic mechanics in a variety of ways,  
57 yet studies are still needed that incorporate a broad sample of closely related species in the  
58 context of phylogenetic relationships in order to rigorously test the associations between  
59 biomechanical features and functional variation.

60 Mantis shrimp use an elastic mechanism to power a diversity of appendage shapes,  
61 ranging from spiny spears to bulbous hammers (Ahyong, 2001; Ahyong and Harling, 2000;  
62 Caldwell, 1975; Caldwell and Dingle, 1976) (Figs. 1&2). The morphology of the appendage  
63 tends to correspond to its function: elongate, spear-shaped appendages ("speakers") are typically  
64 used for sit-and-wait predation of evasive prey (deVries et al., In press), whereas a bulbous  
65 hammer at the base of the dactyl ("smashers") is associated with smashing of hard-shelled prey  
66 (Weaver et al., 2012). A third category, consisting of the basal *Hemisquilla* spp., has  
67 undifferentiated appendages (a sharp dactyl tip and non-bulbous dactyl-heel) which are used for  
68 dislodging hard-shelled prey (e.g., limpets). Smasher strikes occur within milliseconds, can  
69 reach speeds of over 20 m s<sup>-1</sup> (Burrows, 1969; Burrows and Hoyle, 1972; Patek et al., 2004) and  
70 can strike with impact forces of over 1000 N (thousands of times their body weight) coupled  
71 with the considerable forces caused by cavitation bubble collapse (Patek and Caldwell, 2005).

72 Spearer strikes are much slower ( $1\text{-}7\text{ m s}^{-1}$ ) and do not generate cavitation (deVries et al., In  
73 press). *Hemisquilla* spp. have strike durations of approximately 4.5 ms and generate cavitation  
74 (unpubl. data).

75 The strike mechanism operates with a combination of large, slowly contracting muscles,  
76 latches, linkages and exoskeletal elastic structures (Claverie et al., 2011; Patek et al., 2004; Patek  
77 et al., 2007; Zack et al., 2009). In preparation for a power-amplified strike, the lateral extensor  
78 muscle slowly contracts while flexor muscles engage a pair of latches to prevent movement  
79 (Burrows, 1969; Burrows and Hoyle, 1972; McNeill et al., 1972). During this contraction,  
80 elastic energy is stored in the compression of a stiff, exoskeletal structure distal-laterally  
81 positioned on the merus segment (the “meral-V”) and a saddle-shaped structure on the dorsal  
82 surface of the merus (the “saddle”) (Fig. 1) (Patek et al., 2004; Patek et al., 2007; Zack et al.,  
83 2009). When the animal is ready to strike, the flexor muscles relax, release the latches, and the  
84 stored elastic energy is delivered via a linkage mechanism that couples the meral-V and saddle  
85 extension (energy release) to the propulsion of the dactyl and propodus rapidly toward the target  
86 (Burrows, 1969; Burrows and Hoyle, 1972; McNeill et al., 1972; Patek et al., 2004; Patek et al.,  
87 2007; Zack et al., 2009).

88 The evolutionary history of spring mechanics in mantis shrimp has been unstudied until  
89 now, with prior studies focusing on single species mechanics in the smashers, *Gonodactylaceus*  
90 *falcatus*, *Gonodactylus smithii* and *Odontodactylus scyllarus* (Claverie et al., 2011; McHenry et  
91 al., 2012; Patek et al., 2004; Patek et al., 2007; Zack et al., 2009). Recent stomatopod  
92 phylogenies show that the undifferentiated *Hemisquilla* spp. sit at the root of the tree with  
93 spearers emerging from these taxa and smashers occurring as a single origin within the spearers  
94 (Ahyong and Jarman, 2009; Porter et al., 2010). The components of the elastic system are

95 visible as early as the Paleozoic (*Tyrannophontes gigantion*) with a saddle discernable in fossils  
96 (Schram, 2007).

97 The mantis shrimp's use of a catapult-type mechanism sets the stage for several  
98 predictions about the evolutionary variation of elastic mechanisms that should also be applicable  
99 to other elastic systems. First, fundamental spring properties, such as spring force, spring  
100 stiffness and spring work, should scale positively with body size or the size of the elastic system.  
101 In other words, a larger mechanism should yield greater force and work output concomitantly  
102 with greater spring stiffness. Second, homologous structures should serve conserved roles in the  
103 functioning of an elastic mechanism such that disabling parts of the system should result in  
104 similar effects on the amount of elastic energy storage or the efficiency of the system. Third, a  
105 greater kinematic output (e.g., speed and acceleration) should be correlated with a higher spring  
106 force, because a more potent spring should provide greater power and work to an elastic system.  
107 Here we focus on three questions that revolve around these predictions: (1) Are spring force and  
108 spring stiffness correlated with merus length across mantis shrimp or are they decoupled from  
109 each other, as has been found in a single-species study of the smasher, *G. falcatus* (Claverie et  
110 al., 2011; Zack et al., 2009)? (2) Are the conserved morphologies of the meral-V and saddle  
111 across mantis shrimp also reflected in a conserved relative contribution to elastic energy storage?  
112 (3) When compared with spearers and undifferentiated species, do the mechanics of the species  
113 with faster, hammer-shaped appendages indicate a more robust and powerful spring?

## 114 MATERIALS AND METHODS

### 115 Animal acquisition and maintenance

116 Seventy appendages were tested from individuals of twelve mantis shrimp species  
117 (Crustacea: Stomatopoda) that were collected from the field using scientific collection permits as

118 appropriate or purchased from aquarium retailers (Table 1). *Hemisquilla californiensis*,  
119 *Lysiosquillina maculata*, and *L. sulcata* individuals were kept in individual 20 L tanks (salinity:  
120 32-36 ppt.; 22°C). *Squilla empusa* individuals were kept in a 341 L tank separated by dividers  
121 (salinity: 32-36 ppt.; 14-16 °C). All remaining species were kept in individual 2 L plastic cups,  
122 for which the water was changed twice weekly (salinity: 32-36 ppt.; 22°C). Animals were fed a  
123 range of fresh and frozen food twice weekly. Data for *G. falcatus* were acquired from a previous  
124 publication (Zack et al., 2009).

### 125 **Mechanical tests**

126 For each animal, body length and mass were measured with digital calipers (Model CD-  
127 6"PSX, Mitutoyo Corp., Aurora, IL) and a digital balance (APX-3202, 0.01 g resolution; Dover  
128 Instruments, Westborough, MA), respectively. The lateral surface of the merus was photographed  
129 3 times (Nikon D300 SLR camera, AF micro Nikkor 60 mm lens, Nikon, Inc., Melville, NY,  
130 U.S.A.). From these pictures, merus length and the maximum span of connective tissue between  
131 the meral-V and the main body of the merus were measured and then averaged (Fig. 1)  
132 (Sigmascan Pro 5.00, SPSS, Inc, Chicago, IL, U.S.A.). The latter measurement represents the  
133 estimated maximum contraction distance of the meral-V, which was used for setting the  
134 displacement during the mechanical tests. Appendages were kept wet throughout the preparation  
135 to avoid dehydration.

136 The mechanical tests were conducted as previously described in detail in Zack et al.  
137 (2009), thus we will only briefly summarize the preparation here. The mechanical tests were  
138 performed by pulling on a wire placed in the same orientation and attached at the site of the  
139 extensor muscle to mimic the action of the mantis shrimp loading the spring (materials testing  
140 machines: Bluehill 2.12 Instron model 5544; load cell model 2530-416, 0.5 kN maximum, 0.125

141 N resolution or 0.25 % of load, Instron Corp., Canton, MA, U.S.A. and WaveMatrix 1.4, Instron  
142 model E1000; dynamic load cell model 2527-129, 2 kN maximum, resolution of 0.5 % of load,  
143 Instron Corp., Canton, MA, U.S.A.). The appendage was compressed to the maximum  
144 contraction distance of the meral-V and then relaxed until it returned to its resting position. A  
145 velocity was set for each specimen such that the full compression and relaxation phases of the  
146 cycle each took 700 ms, the approximate contraction time of the extensor muscle prior to a strike  
147 (Burrows and Hoyle, 1972). Force-displacement data were recorded for the compression and  
148 relaxation phases at 500 samples per second. Each compression-relaxation cycle was repeated  
149 10 times, waiting at least 3 minutes in between each cycle.

150 To test the relative contribution of the saddle to elastic energy storage, we severed the  
151 saddle on 47 appendages from 40 individuals encompassing 11 species (*Pseudosquilla ciliata*  
152 appendages broke within the first 1-2 pulls on intact appendages, so they could not be used for  
153 saddle tests). These appendages were contracted 10-20 times with an intact saddle followed by  
154 10 times with the saddle cut by a scalpel along the medial-lateral axis. Given the previous study  
155 showing that the number of trials did not affect spring parameters (Zack et al., 2009), we  
156 performed a relatively small control study with which to compare the effects of cutting the saddle  
157 with tests for which the saddle was not cut. We compared intact saddle tests from trials 11– 20  
158 (one individual was missing trial 11, so we examined trials 12-20 in this case) to intact saddle  
159 tests performed from trials 1-10 in 4 species (2 *Gonodactylus chiragra*, 8 *Gonodactylaceus*  
160 *falcatus*, 2 *Gonodactylus smithii*, 1 *Neogonodactylus oerstedii*).

## 161 **Data analysis**

162 The force-displacement data from the spring tests were used to measure the maximum  
163 force of the spring (the maximum force achieved during the force-displacement test), work



164 performed during loading and unloading of the spring (the area under the loading and unloading  
165 curves, respectively), resilience (work during unloading divided by work during loading) and the  
166 spring constant,  $k$  (the slope of the force-displacement curve). The spring constant was  
167 calculated by fitting linear regressions equal to 25% of the length of the loading curve  
168 sequentially along the length of the curve and then finding the line with the peak slope. The first  
169 10% of the force-displacement curve was excluded from this analysis (and all subsequent  
170 analyses and calculations) due to spurious noise that often occurred in the first few ms of some  
171 tests. A linear curve fit was used, based on alternative model comparisons presented in Zack *et*  
172 *al.* (2009) and also because all of the linear fits in this study were statistically significant (1024  
173 out of 1598 tests had  $R^2$  values exceeding 0.9999; the remainder had  $R^2$  values greater than  
174 0.8933). It should be noted that this method of finding the spring constant differs from previous  
175 studies of mantis shrimp in which the spring constant was determined at a set location along the  
176 force-displacement curve (Claverie *et al.*, 2011; Zack *et al.*, 2009). We used the dynamic method  
177 due to the large variability in the force-displacement curves across taxa and because the fixed  
178 location method often missed the location of peak spring constant. Analyses were performed  
179 using custom software (Matlab v. 7.11.0, R2010b, The Mathworks, Natick, MA).

180 The force-displacement data were processed prior to use, due to a programming error in  
181 the Instron manufacturer's software that accompanied tests run on the Instron 5544 (Claverie *et*  
182 *al.*, 2011; Zack *et al.*, 2009) in which only the force data were filtered and not the displacement  
183 data, causing a temporal offset in the two datasets. Instron engineers provided a Matlab program  
184 to fix the problem, which successfully filtered and removed the temporal offset (118 Hz, 4-pole  
185 elliptical low pass filter followed by a 10 Hz 2-pole Butterworth low pass filter to the  
186 displacement data). The data from *G. falcatus* were originally collected and described in Zack *et*

187 al. (2009) and re-analyzed using this method as were the rest of the data collected from the  
188 Instron model 5544.

189         Within species, we examined the correlations between merus length and spring  
190 characteristics (least-square linear regression), the effect of sex on spring characteristics (Welch  
191 two sample t-test), and the effect of cutting the saddle on spring characteristics (Paired two  
192 sample t-test) as implemented in R (v. 2.11.1, R\_Core\_Team, 2012 ).

193         Across species, we estimated the degree of phylogenetic signal to be used for  
194 phylogenetic tests and applied this scaling parameter ( $\lambda$ ) to phylogenetic generalized least  
195 squares (PGLS) tests of correlations among appendage type, average species values for spring  
196 traits and merus length (ape and caper packages in R, v. 2.15.1, Freckleton et al., 2002; Nunn,  
197 2011; Orme et al., 2012; Paradis et al., 2004; R\_Core\_Team, 2012 ). We also examined the  
198 association between the effect of cutting the saddle and appendage type. We used two  
199 categorizations of appendage type in these analyses. In one set of tests, we coded appendage  
200 type as either absence of hammer or presence of hammer. In the second set of tests, we coded  
201 appendage type as absence of spear or presence of spear. For all cross-species tests, three  
202 datasets were tested: all individuals, males only and females only. Significance level was set at  
203 0.05 and all tests were two-tailed.

204         We used a recently published molecular phylogeny with branch lengths proportional to  
205 genetic change (Porter et al., 2010). The tree was pruned in R to include only the taxa for which  
206 we had spring data (Table 1, Fig. 2). We added *Neogonodactylus wennifer* to the  
207 *Neogonodactylus* clade as a polytomy based on a previous molecular phylogenetic analysis,  
208 which grouped *Neogonodactylus* taxa together (Cheroske et al., 2006).

209

## RESULTS

## 210 **Scaling of spring mechanics**

211 We compared spring characteristics across species and found that maximum force, work  
212 during loading, and work during unloading are significantly correlated with merus length in all  
213 datasets (all individuals, males only, females only) (Tables 2-4; Figs. 3-5). Spring constant and  
214 resilience show no significant associations with merus length except in the females-only dataset  
215 in which resilience is significantly associated with merus length (Tables 3&4; Figs. 4&5). In  
216 order to look at scaling within species, we included species for which we had a minimum of 5  
217 individuals, resulting in a total of 4 smasher species and 1 spearer (Table 5). Of the smashers, *G.*  
218 *falcatus*' maximum force, work during loading and unloading are positively correlated with  
219 merus length; resilience does not vary with merus length. In *G. smithii*, only work during  
220 loading and unloading are positively correlated with merus length. Spring constant scaling is  
221 negatively correlated with merus length in two smasher species (*G. chiragra*, *G. falcatus*) and  
222 positively correlated in one spearer species (*L. maculata*).

223 Of the three species for which we were able to conduct comparisons of males and females  
224 (*G. falcatus*, *G. chiragra*, *G. smithii*), there are significant differences in spring mechanics and  
225 sizes. In terms of the sizes of the appendage components, *G. chiragra* sexes are not significantly  
226 different in merus length ( $t=-0.15$ ,  $df = 5.4$ ,  $p=0.89$ ), female merus lengths are larger than males  
227 in *G. falcatus* ( $t=3.44$ ,  $df=14.1$ ,  $p=0.004$ ) and smaller in *G. smithii* ( $t=3.70$ ,  $df=9.0$ ,  $p=0.005$ ).  
228 The comparisons of spring mechanics only yield differences in *G. falcatus* (all  $p$ -values  $> 0.14$   
229 for *G. chiragra* and *G. smithii*). *G. falcatus* males have significantly higher maximum force  
230 (Welch two sample  $t$ -test,  $t=3.09$ ,  $df = 12.3$ ,  $p=0.009$ ), greater work during loading ( $t=3.51$ ,  
231  $df=12.6$ ,  $p=0.004$ ) and greater work during unloading ( $t=2.97$ ,  $df=11.7$ ,  $p=0.012$ ) than females,  
232 even though males have smaller merus lengths than females. Resilience is lower in females than

233 males in *G. falcatus* ( $t=-2.40$ ,  $df=13.7$ ,  $p=0.031$ ) and there is no effect of sex on spring constant  
234 ( $t=-1.04$ ,  $df=11.2$ ,  $p=0.32$ ).

### 235 **Morphological variation and elastic energy storage**

236  
237 Cutting the saddle has no significant effects in the spearer *L. maculata* , but significantly  
238 affects all of the spring characteristics in *G. falcatus*, the maximum force, work and resilience in  
239 *G. chiragra*, and only force and work in *G. smithii* (Table 6). The decrease in spring function  
240 after cutting the saddle is most substantial in work during loading (*G. chiragra*: -20.4%; *G.*  
241 *falcatus*: -18.6%; *G. smithii*: -14.1%), followed by work during unloading (*G. chiragra*: -17.8%;  
242 *G. falcatus*: -15.2%; *G. smithii*: -14.0%) and maximum force (*G. chiragra*: -15.6%; *G. falcatus*: -  
243 14.5%; *G. smithii*: -10.6%) (Table 6). In the control tests comparing intact saddles at two trial  
244 ranges (trials 1-10, 11 or 12-20), we performed paired t-tests by lumping all of the species  
245 together and by looking only within *G. falcatus* tests. The results are qualitatively the same for  
246 both, so we report only the *G. falcatus* results. Spring constant decreases in the second set of  
247 trials (mean difference = -2.47,  $t = -2.4725$ ,  $df = 7$ ,  $p = 0.0427$ ) and the remaining parameters do  
248 not change significantly (maximum force:  $t = -0.8475$ ,  $df = 7$ ,  $p = 0.425$ ; work during loading:  $t$   
249  $= 0.3866$ ,  $df = 7$ ,  $p\text{-value} = 0.711$ ; work during unloading:  $t = -0.5384$ ,  $df = 7$ ,  $p = 0.607$ ;  
250 resilience:  $t = -2.1227$ ,  $df = 7$ ,  $p = 0.0714$ ).

251 We examined the effect of cutting the saddle in a phylogenetic framework by measuring  
252 the percent change in each spring parameter after cutting the saddle and then averaging the  
253 individual values to provide a value for each species (Table 7). A greater percent decrease in  
254 maximum slope and maximum force occurred in non-hammering shrimp compared to  
255 hammering shrimp (maximum slope:  $t=4.47$ ,  $p=0.002$ ; maximum force:  $t=2.70$ ,  $p=0.027$ ) and in  
256 spearing shrimp compared to non-spearing shrimp (maximum slope:  $t=-3.82$ ,  $p=0.000$ ; maximum

257 force:  $t=-2.74$ ,  $p=0.026$ ). The remaining parameters (percent change after saddle cutting in work  
 258 loading, work unloading and resilience) are not correlated with appendage type. All tests yield  $\lambda$   
 259 = 0, with the exception of maximum slope in the no spear/spear test in which  $\lambda = 0.856$  and is not  
 260 significantly different from 0 or 1.

261 During materials testing, the percentages of appendage breakage (defined as when the  
 262 appendage visibly cracked during the first trial of the test) are 11.6% ( $n=43$  appendages tested) in  
 263 the smasher species, 72.7% ( $n=11$  appendages) in the undifferentiated species, and 37.5% ( $n=16$   
 264 appendages) in the spearer species. The five instances of appendage breakage in smashers  
 265 occurred at an average of 94% of the total excursion of the meral-V contraction (*G. chiragra*:  
 266 94%, 3 individuals; *G. smithii*: 98%, 1 individual; *N. wenneae*: 91%, 1 individual). By contrast,  
 267 the undifferentiated species and spearer species broke at an average of 74% of the total  
 268 contraction distance of the meral-V (*H. californiensis*: 66%, 8 individuals; *P. ciliata*: 83%, 6  
 269 individuals).

## 270 **Correlation between spring mechanics and raptorial appendage type**

271 Analyses of the association between spring mechanics and appendage type largely  
 272 yielded non-significant associations and mixed support for a Brownian motion model of  
 273 evolution. Work during loading is significantly associated with appendage type by merus length  
 274 interaction when appendage type is coded as presence and absence of a spear ( $df=4,6$ ; merus  
 275 length:  $t=14.02$ ,  $p=0.000$ ; appendage type:  $t=1.09$ ,  $p=0.317$ ; merus length \* appendage type:  $t=-$   
 276  $4.43$ ,  $p=0.004$ ;  $\lambda=1$ ) as is work during unloading ( $df=4,6$ ; merus length:  $t=13.7$ ,  $p=0.000$ ;  
 277 appendage type:  $t=0.125$ ,  $p=0.904$ ; merus length \* appendage type:  $t=-3.43$ ,  $p=0.014$ ;  $\lambda=1$ ) (Figs.  
 278 4&5). Similar results were found with resilience, with a significant association with appendage  
 279 type as well as the interaction term ( $df=4,6$ ; merus length:  $t=-0.79$ ,  $p=0.457$ ; appendage type:  $t=-$   
 280  $5.8$ ,  $p=0.001$ ; merus length \* appendage type:  $t=4.79$ ,  $p=0.003$ ;  $\lambda=0.96$ ). The remaining spring



304 how the emerging patterns may fit with other spring mechanisms in biology, and briefly discuss  
305 future directions for phylogeny-based analyses of spring mechanics.

306 **Are spring force, stiffness and work correlated with merus length?**

307 The within and cross-species results generally show that larger mantis shrimp require  
308 more force to compress the elastic mechanism and perform more work during loading and  
309 unloading. Spring stiffness does not consistently scale with size within and across species,  
310 although within-species scaling is species-specific (Tables 4&5), such that two smasher species  
311 have negative size correlations with spring constant and one spearer has a positive size  
312 correlation with spring constant (Table 5).

313 Why would within-species scaling of spring stiffness differ from the lack of association  
314 found across species? Although speculative, one possible explanation is that the muscle force  
315 required to load the spring scales with body size at a slower rate than inherent exoskeletal  
316 stiffness. This would mean that as a spring increases in size, changes in shape or material would  
317 be necessary to reduce stiffness scaling such that the muscles could still compress it (Zack et al.,  
318 2009). One outcome would be the lack of scaling between spring stiffness and merus size that  
319 we found across species (Figs. 4&5). Additionally, if some species use their spring mechanism  
320 minimally, or not at all, the muscle-scaling constraint may not be present and thus one would  
321 expect spring stiffness and body size to be positively correlated. Indeed, the fact that we see a  
322 positive correlation in a spearer (Table 5), which apparently does not flex its meral-V during  
323 strikes (deVries et al., In press) and that spearers, in general, are more likely to break during  
324 loading (Table 1), suggests that this may be a reasonable hypothesis to test in future studies.  
325 Furthermore, in a geometric morphometric analysis of spring shape within and across species, a  
326 potential release from selection in the spring of spearers was observed (Claverie and Patek, In

327 revision). At the very least, these results point to the importance of examining spring scaling at  
328 both macro-evolutionary scales and within species before ascribing general principles about  
329 spring stiffness scaling in muscle-driven systems.

330 In addition to scaling within and across species, we also find sex differences in one  
331 smasher, *G. falcatus*. Even though males have smaller merus length on average than females,  
332 their spring force, work and resilience are higher than females. Thus, male *G. falcatus* may have  
333 a more robust striking mechanism than do females due to sexual selection or differing sex roles  
334 for burrow building or food acquisition (Claverie et al., 2011). *G. falcatus*' dataset, the largest by  
335 far, yields the most straightforward scaling findings, suggesting that further studies should  
336 include larger datasets and a larger merus length range to effectively tackle within-species  
337 scaling issues. Cross-species analyses run with both sexes, males-only or females-only show no  
338 substantive differences based on sex.

339 Another major feature of springs is their resilience – the ability to recover stored elastic  
340 energy during unloading. In order to be effective and efficient at releasing energy, the resilience  
341 must be high, which is certainly the case in mantis shrimp (overall: 74%; smashers: 76%;  
342 spearers: 70%; undifferentiated: 71%). Indeed, even with these overall high levels, smashers  
343 have significantly greater resilience than spearers (whether coded as smashers/non-smashers or  
344 spearers/non-spearers). It should be noted that resilience measures pose challenges when  
345 studying extremely fast release mechanisms. In mantis shrimp, the release of elastic potential  
346 energy happens at over 300 times the rate of loading. For example, in *Odontodactylus scyllarus*,  
347 the loading of the spring happens on the order of 700 ms and the release occurs in less than 2 ms  
348 (Burrows, 1969; Patek et al., 2004; Patek et al., 2007). Even the fastest materials testing  
349 machines cannot cycle at these rates, so our estimates of resilience are based on a much slower



350 release of elastic energy than actually occur in the animals. Perhaps different material behavior  
351 prevails at very short time scales; to our knowledge, material changes at these time scales have  
352 yet to be assessed in any biological system.

353         The broader applicability of these approaches and findings to other taxa is dependent on  
354 the ability to make comparable spring measurements across species. Biological springs follow a  
355 consistent behavior during loading: a low slope (“toe region” that represents the slack in the  
356 spring) is followed by a linear increase (“plastic region” that equals the maximum rate change in  
357 force for a given displacement) and then a transition to a flat slope (Zajac, 1989). While this  
358 behavior is repeatable, the displacement of the spring at which the maximum, linear slope occurs  
359 is variable. In previous mantis shrimp studies, the slope was measured at a fixed displacement  
360 (Claverie et al., 2011; Zack et al., 2009). In the present study, we identify the location  
361 dynamically by computationally searching along the length of the force-displacement curve to  
362 find the peak slope along the linear region (Fig. 3). We find a negative correlation between  
363 merus length and stiffness in *G. falcatus* using the same dataset as used in Claverie et al  
364 (Claverie et al., 2011), whereas they found no association with merus length. Formalization of  
365 spring measurement approaches is key to successful cross-species analyses of spring mechanics  
366 and this dynamic method of identifying the slope may be a first step toward that goal.

367 **Are the conserved spring morphologies reflected in conserved contributions to energy**  
368 **storage?**

369         The overall morphology shows a conserved system in terms of the component parts, but  
370 also that the component parts vary noticeably across taxa. All of the species exhibit a prominent  
371 saddle that sits on the dorsal or dorsal-medial side of the merus and a meral-V that extends from  
372 the lateral meral-carpal joint to a ventral bar that runs along the underside of the merus (Fig. 1).

373 One notable difference across species is in the placement of the saddle (Fig. 1). In the spearers,  
374 the saddle is positioned directly on the dorsal surface of the merus with the midline of the merus  
375 approximately running through the midline of the saddle. In contrast, all of the smasher species  
376 have a medially located saddle, to the extent that, in some species, the saddle is not visible at all  
377 from the lateral side of the merus (Fig. 1). The undifferentiated species, *H. californiensis*, has a  
378 slightly medially positioned saddle.

379 We find that the meral-V is the primary structure used for elastic energy storage across  
380 species, yet the appendage is more likely to fracture at an earlier point in its rotation in spearers  
381 compared to smashers (Tables 1&2). Indeed, in one spearer species (*P. ciliata*), we were unable  
382 to flex the meral-V without appendage fracture. The fracture rates suggest that spearers either do  
383 not flex their meral-V's to the extent indicated by their morphology (Fig. 1) or perhaps they use a  
384 subtly different loading regime which rotates the meral-V at a different rate or orientation than in  
385 the smashers.

386 Although the saddle does not store the majority of elastic energy, its contributions are  
387 substantial. Cutting the saddle decreases spring performance almost uniformly across all species,  
388 with the exception of resilience (Table 7). When the saddle is cut, maximum force in the  
389 smashers decreases by an average of 15%, spearers by 28% and undifferentiated by 22% (Table  
390 7). Statistical analyses of within-species patterns show significant decreases in spring force and  
391 work in three smasher species (Table 6). Cross-species analyses show that spearers exhibit  
392 statistically significantly greater decreases in maximum force and spring constant after saddle-  
393 cutting compared to smashers.

394 These results suggest that mantis shrimp are using the elastic components differently  
395 across species. The greater fracture rates at smaller excursions of the meral-V in spearers, the

396 generally lower spring work relative to body size in spearers (discussed in next section), and the  
397 larger effect of saddle-cutting on spring stiffness and force compared to smashers, suggest that  
398 the saddle plays different roles in smashers and spearers. Specifically, stiffness and force can be  
399 associated with structural stability and not necessarily elastic energy storage. Thus, the saddle  
400 may be functioning to a greater extent for the overall stability and strength of the spearer's  
401 merus, while the elastic mechanism, via meral-V flexion, is less potent and less flexible than in  
402 smashers. Indeed, this is potentially reflected in the saddle position. The dorsal position of the  
403 saddle in spearers is oriented such that it directly opposes the action of the extensor muscle to  
404 flex the dorsal exoskeleton of the merus. In contrast, the saddle's more medial orientation in  
405 smashers may permit flexion to medial-laterally equilibrate the large, lateral flexions of the  
406 meral-V.

#### 407 **Are spring mechanics correlated with raptorial appendage type?**

408 Comparative analyses of spring mechanics between stomatopod taxa with hammers,  
409 spears and undifferentiated appendages yield several general results: non-spearers have greater  
410 work during loading and greater work during unloading for a given merus length as well as  
411 greater resilience compared to spearers (Tables 3&4, Figs. 4&5). Furthermore, when the saddle  
412 is cut, spearers experience significantly greater decreases of spring stiffness and maximum spring  
413 force. These results are consistent with the findings that spearers strike relatively slowly  
414 (deVries et al., In press) and that their spring mechanism is not as robust as in the other mantis  
415 shrimp species (Table 1). Thus, as predicted, the fastest mantis shrimp species ("smashers")  
416 have more robust springs. The second set of results suggests that the saddle's role has shifted  
417 across mantis shrimp species (as discussed above).

418 If these two lines of evidence are combined with the observation that spearer meral-V's

419 are more likely to fail during loading than in the other species, the overall results suggest that the  
420 functions of the spring components have shifted in this clade. Specifically, spearers rely on the  
421 saddle for structural support of their raptorial appendages as evidenced by a greater shift in  
422 stiffness and maximum force with saddle-severing across species without concomitant effects on  
423 the work performed by the system. Given that the smashers are a derived clade, nested within  
424 the spearers, it seems likely that their ability to generate extremely fast and powerful strikes is  
425 tied to a shift in spring location, function and performance. The final step in these analyses is to  
426 more thoroughly probe the basal group, *Hemisquilla* spp., to determine whether they represent a  
427 more saddle-based structural system or if they rely more extensively on the meral-V flexion for  
428 elastic energy storage.

429 By comparing spring mechanics within and across species, it is evident that both levels  
430 of analysis are necessary to fully understand spring-loading in mantis shrimp. In this case, the  
431 within-species comparisons of saddle-cutting suggest that the saddle is more important in  
432 smashers than non-smashers. By contrast, the more substantive dataset represented by the cross-  
433 species, phylogeny-based analyses, strongly shows an association between saddle-cutting and  
434 decrease in maximum force and stiffness in spearers. Thus, this comparative approach shows  
435 that a simple “conserved” morphology of an elastic system does not equate with conserved  
436 functions/roles of all of the component parts.

#### 437 *Concluding thoughts*

438 Identification of the appropriate morphological or mechanical level at which to compare  
439 spring mechanics is a particular challenge of conducting cross-species analyses, given that  
440 comparative spring mechanics are pursued from molecular arrangements to the energetics of  
441 entire organisms (Bennet-Clark, 1976; Heglund et al., 1982; Tatham and Shewry, 2002). For

442 example, the material composition or molecular arrangements of a spring explain key features  
443 like resilience (Burrows et al., 2008; Lv et al., 2010), yet these parameters may not scale up to  
444 explain the overall performance or function of the system. Tests of a whole structure – such as a  
445 locust or wallaby leg (Katz and Gosline, 1992; McGowan et al., 2008a) – provide mechanical  
446 properties that are directly relevant to function, such as if the system operates linearly as a  
447 Hookean spring. However, the mechanical properties may not illuminate the material basis for  
448 how these spring performance differences are actually achieved, for example, through increases  
449 in spring mineralization that increase spring stiffness or spring force. Historically, energetic  
450 analyses of movement are most often used to reveal the role of elastic mechanisms (Alexander,  
451 1988; Bennet-Clark, 1976). This approach provides the functional output most closely linked to  
452 an organism's performance, but often "black-boxes" the building blocks of the spring  
453 mechanism, to the point that the presence of elastic energy storage is known to be vital to the  
454 function of the system, but the location of the elastic mechanism is uncertain - the case in many  
455 well-studied vertebrate systems (Roberts and Azizi, 2011).

456         The bulk of mantis shrimp research has focused on the mechanical level of analysis  
457 (Claverie et al., 2011; McHenry et al., 2012; Patek et al., 2007; Zack et al., 2009), with fewer  
458 analyses of the energetics of the system (Burrows, 1969; McHenry et al., 2012; Patek et al.,  
459 2004). The mechanical level has allowed us to test the entire structure such that we approximate  
460 and compare the spring-loading regime in the way that the mantis shrimp actually use it.  
461 However, the material basis for the variation observed in this study remains unknown. For  
462 example, the variable size-stiffness relationships within and across species could be driven by  
463 shifts in material composition (e.g., rubbery proteins or mineralization) or solely through shape  
464 changes. The saddle's varying contribution to elastic energy storage could be due to material

465 changes or simply the orientation and positioning of the structure. Furthermore, within- and  
466 cross-species geometric morphometric analyses of spring shape variation indicate different  
467 processes acting at the ontogenetic and macroevolutionary levels (Claverie and Patek, In  
468 revision). Reconciling and connecting the biomechanical levels of analysis along with the  
469 individual to cross-species levels of analysis offer both challenges and opportunities for probing  
470 the sources, patterns and processes involved in the evolutionary history of elastic systems.

471 With the advent of numerous phylogenies, more tractable phylogeny-based statistical  
472 packages and the technical efficiency of mechanical tests, one can hope that this study is at the  
473 cusp of a new era in the study of power amplification in organisms – one in which the richness of  
474 evolutionary diversity can be used to enhance and inform our understanding of the structure,  
475 function and evolution of biological springs.

#### 476 **ACKNOWLEDGEMENTS**

477 R. Caldwell, T. Claverie, M. deVries, D. Drumm, R. Heard, and E. Staaterman made this study  
478 possible through their tremendous assistance in locating or collecting mantis shrimp. We are  
479 grateful for the advice on phylogenetic comparative methods from C. L. Nunn and for the use of  
480 several photographs from R. Caldwell and T. Claverie. T. Claverie, M. deVries, E. Murphy and  
481 an anonymous reviewer provided helpful comments on the manuscript. This research was  
482 supported by a National Science Foundation (NSF) Minority Postdoctoral Fellowship (to  
483 J.R.A.T.), an internship from the Northeast Alliance for Graduate Education and the Professoriate  
484 (to M.V.R.), a NSF Integrative Organismal Systems grant (#1014573 to S.N.P.) and a Radcliffe  
485 Fellowship (to S.N.P.).

488 **FIGURE LEGENDS**

489  
490  
491  
492  
493  
494  
495  
496  
497  
498  
499  
500  
501  
502  
503  
504  
505  
506  
507

**Figure 1.** Regardless of appendage type, mantis shrimp share the same basic components of an elastic mechanism found in the merus segment of the raptorial appendages. Spearers, e.g., *Squilla empusa* (A), have an elongate raptorial appendage (B) used for capturing evasive prey. Smashers, e.g., *Gonodactylaceus falcatus* (C), use a hammer-shaped dactyl (D) to smash hard-shelled prey. Undifferentiated taxa, e.g., *Hemisquilla californiensis* (E), use an undifferentiated dactyl (F) to dislodge and process hard-shelled prey (black bar on dactyl is a forcep). A schematic (G) shows an appendage loaded in advance of a strike (left) with the meral-V and saddle compressed through the action of the merus extensor muscles (red dashed line). When released (right), the meral-V and saddle rapidly extend back to their resting state and the meral-V pushes the appendage distally toward the target. When tested in a materials testing machine, a wire was attached and oriented in the same position as the extensor muscle to compress the elastic mechanism similarly to live mantis shrimp. The amount of compression applied by the materials testing machine was determined by the opening between the meral-V and proximal merus ( $V_{\text{dist}}$ ) in the released position. Arrows in animal photos indicate raptorial appendage. Raptorial appendage photos are lateral views of the left appendage. Scale bars are 5 mm. To experience a more detailed perspective of these different appendages types, a supplementary video of rotating, rendered micro-CT scans is available online.

508 **Figure 2.** Twelve mantis shrimp species were tested in this study, including an undifferentiated basal  
509 species, *H. californiensis* (scale bar = 1 cm), four spearing species (*P. ciliata*, *L. sulcata*, *L. maculata* and  
510 *S. empusa*; scale bar = 1 cm) and seven smashing species (*G. falcatus*, *G. chiragra*, *G. smithii*, *N.*  
511 *wennerae*, *N. festae*, *N. oerstedii*, *N. bredini*; scale bar = 5 mm). Tree topology and branch lengths (not  
512 depicted here) are from the maximum likelihood phylogeny presented in Porter *et al.* (Porter et al., 2010)

513 with the taxa not tested here pruned from the original tree. *N. wennifer* was added to the tree based on  
514 the topology for the genus *Neogonodactylus* in Cheroske *et al* (Cheroske *et al.*, 2006). All of *P. ciliata*'s  
515 appendages broke during the tests so those results are not included in the phylogenetic analyses. *N. festae*  
516 is placed on this tree for illustrative purposes; it is not included in the phylogenetic analyses, because of  
517 the uncertainty in its phylogenetic position. Lateral views of the raptorial appendages are shown.

518

519 **Figure 3.** Representative force displacement curves are shown in each species for which spring  
520 compression tests were successfully performed. The thin lines show the displacement from onset of the  
521 test to maximum force. The thick lines show the location of maximum slope (spring constant).

522

523 **Figure 4.** The scaling of spring characteristics across species. Each graph shows mean values for each  
524 individual within each species using the color-shape scheme shown in the legend.

525

526 **Figure 5.** Cross-species scaling relationships were statistically analyzed using phylogenetic comparative  
527 analyses. The values shown here are the means for each species (color-shape scheme in legend) with  
528 males and females combined. The lines are calculated using PGLS. Given that these values exhibited  $\lambda=0$   
529 (no phylogenetic signal), the lines are equivalent to a regression on the raw data.

530



Table 1. Sample sizes, collection location, and body sizes of the species used in the study. The rate of appendage failure during materials tests is included; note that all *Pseudosquilla ciliata* failed during material testing.  $N$  is the number of individuals and  $n$  is the number of appendages tested that did not fail on the first pull.  $N_i$  and  $n_i$  are the total number of individuals and appendages tested respectively including failures. The appendage failure rate for *G. falcatus* is not reported, because failure data were not comparably recorded in the previous study (Zack et al., 2009). Row colors indicate appendage type (smashers: white; undifferentiated: dark-gray; spearers: light-gray).

| Family           | Genus                  | Species               | $N(n)$ | $N_i(n_i)$ | Mass (g)     | Carapace length (mm) | Collection location                         | Appendage failure (%) |
|------------------|------------------------|-----------------------|--------|------------|--------------|----------------------|---------------------------------------------|-----------------------|
| Gonodactylidae   | <i>Gonodactylaceus</i> | <i>falcatus</i>       | 18(18) | --         | 0.75-3.09    | 7.92-13.87           | Oahu, Hawaii                                | na                    |
| Gonodactylidae   | <i>Gonodactylus</i>    | <i>chiragra</i>       | 13(10) | 15(12)     | 3.00-11.00   | 12.43-19.39          | Lizard Island, Australia                    | 20                    |
| Gonodactylidae   | <i>Gonodactylus</i>    | <i>smithii</i>        | 12(11) | 15(14)     | 3.60-6.60    | 13.84-17.31          | Lizard Island, Australia                    | 6.7                   |
| Gonodactylidae   | <i>Neogonodactylus</i> | <i>bredini</i>        | 1(1)   | 1(1)       | 1.20         | 9.51                 | Isla Galeta, Panama                         | 0                     |
| Gonodactylidae   | <i>Neogonodactylus</i> | <i>festae</i>         | 1(1)   | 1(1)       | 1.00         | 8.58                 | Isla Naos, Panama                           | 0                     |
| Gonodactylidae   | <i>Neogonodactylus</i> | <i>oerstedii</i>      | 6(6)   | 7(7)       | 1.50-4.70    | 10.28-15.47          | Isla Galeta, Panama                         | 0                     |
| Gonodactylidae   | <i>Neogonodactylus</i> | <i>wennerae</i>       | 3(2)   | 4(3)       | 2.30-3.70    | 11.37-13.56          | Tampa Bay, Florida                          | 25                    |
| Hemisquillidae   | <i>Hemisquilla</i>     | <i>californiensis</i> | 11(3)  | 11(3)      | 29.91-102.21 | 23.71-35.55          | Santa Catalina Island, California           | 72.7                  |
| Lysiosquillidae  | <i>Lysiosquillina</i>  | <i>maculata</i>       | 5(5)   | 5(5)       | 36.50-236    | 27.45-48.42          | Lizard Island, Australia                    | 0                     |
| Lysiosquillidae  | <i>Lysiosquillina</i>  | <i>sulcata</i>        | 3(3)   | 3(3)       | 39.90-50.80  | 26.94-29.51          | Moorea, French Polynesia                    | 0                     |
| Pseudosquillidae | <i>Pseudosquilla</i>   | <i>ciliata</i>        | 4(0)   | 6(0)       | 3.81-4.88    | 14.23-15.23          | Oahu, Hawaii                                | 100                   |
| Squillidae       | <i>Squilla</i>         | <i>empusa</i>         | 2(2)   | 2(2)       | 9.72-20.30   | 18.84-23.79          | Gulf Coast Research Laboratory, Mississippi | 0                     |

Table 2. Spring characteristics and size within each species. Results are presented as mean  $\pm$  standard deviation (minimum – maximum). \*one individual was missing body size data. N is the number of individuals tested per species. When two appendages were tested per individual, those two values are averaged to form one value for that individual. Row colors indicate appendage type (smashers: white; undifferentiated: dark-gray; spearers: light-gray).

| Species                  | N   | Spring constant (N mm <sup>-1</sup> ) | Max force (N)                       | Work: load (mJ)                     | Work: unload (mJ)                  | Resilience (%)                     | Body length (mm)                      | Merus length (mm)                  |
|--------------------------|-----|---------------------------------------|-------------------------------------|-------------------------------------|------------------------------------|------------------------------------|---------------------------------------|------------------------------------|
| <i>G. falcatus</i>       | 18  | 64.78 $\pm$ 20.49<br>(37.43-121.68)   | 24.87 $\pm$ 7.04<br>(14.38-39.98)   | 5.32 $\pm$ 2.76<br>(1.89-10.88)     | 3.88 $\pm$ 1.98<br>(1.29-8.10)     | 73.51 $\pm$ 4.80<br>(66.55-84.02)  | 45.28 $\pm$ 6.66<br>(33.34-53.73)     | 13.76 $\pm$ 2.46<br>(9.32-17.57)   |
| <i>G. chiragra</i>       | 10* | 48.90 $\pm$ 18.49<br>(21.64-80.65)    | 34.17 $\pm$ 6.27<br>(25.47-43.90)   | 11.70 $\pm$ 4.28<br>(5.50-16.71)    | 8.88 $\pm$ 4.09<br>(3.73-14.77)    | 73.90 $\pm$ 10.83<br>(58.97-88.43) | 62.29 $\pm$ 8.71<br>(52.28-82.07)     | 17.96 $\pm$ 2.24<br>(15.59-22.03)  |
| <i>G. smithii</i>        | 11  | 38.80 $\pm$ 13.84<br>(23.12-72.30)    | 39.84 $\pm$ 10.69<br>(25.23-56.42)  | 16.81 $\pm$ 6.26<br>(7.85-26.53)    | 13.16 $\pm$ 5.39<br>(6.08-22.68)   | 77.92 $\pm$ 8.47<br>(62.25-89.33)  | 62.11 $\pm$ 4.70<br>(53.88-67.74)     | 18.45 $\pm$ 1.47<br>(16.24-20.89)  |
| <i>N. bredini</i>        | 1   | 27.14                                 | 20.08                               | 5.64                                | 4.35                               | 77.26                              | 38.18                                 | 12.05                              |
| <i>N. festae</i>         | 1   | 36.37                                 | 18.33                               | 3.87                                | 3.25                               | 84.02                              | 35.51                                 | 11.13                              |
| <i>N. oerstedii</i>      | 6   | 35.62 $\pm$ 15.54<br>(23.56-63.91)    | 21.85 $\pm$ 10.25<br>(10.01-40.22)  | 6.47 $\pm$ 3.26<br>(2.07-11.13)     | 4.55 $\pm$ 2.30<br>(1.11-7.26)     | 69.15 $\pm$ 9.24<br>(53.55-78.72)  | 47.49 $\pm$ 7.78<br>(39.14-61.73)     | 14.06 $\pm$ 2.00<br>(12.50-17.76)  |
| <i>N. wennerae</i>       | 2   | 43.33 $\pm$ 0.42<br>(43.03-43.63)     | 26.77 $\pm$ 0.34<br>(26.53-27.01)   | 7.58 $\pm$ 0.31<br>(7.36-7.80)      | 5.75 $\pm$ 1.37<br>(4.78-6.72)     | 74.77 $\pm$ 16.14<br>(63.36-86.19) | 49.93 $\pm$ 4.64<br>(46.65-53.22)     | 16.01 $\pm$ 2.38<br>(14.32-17.69)  |
| <i>H. californiensis</i> | 3   | 36.21 $\pm$ 8.75<br>(26.80-44.10)     | 75.75 $\pm$ 30.73<br>(41.38-100.58) | 76.48 $\pm$ 41.15<br>(30.18-108.86) | 55.14 $\pm$ 33.87<br>(21.30-89.05) | 71.24 $\pm$ 10.36<br>(61.20-81.89) | 147.69 $\pm$ 27.37<br>(118.97-173.47) | 30.34 $\pm$ 6.81<br>(22.74-35.90)  |
| <i>L. maculata</i>       | 5   | 46.67 $\pm$ 16.03<br>(24.38-62.81)    | 87.31 $\pm$ 35.98<br>(37.38-125.24) | 60.01 $\pm$ 31.58<br>(20.57-96.48)  | 49.34 $\pm$ 26.17<br>(16.18-82.51) | 82.37 $\pm$ 4.91<br>(78.35-89.44)  | 225.81 $\pm$ 47.13<br>(147.03-266.71) | 43.54 $\pm$ 10.45<br>(26.56-54.37) |
| <i>L. sulcata</i>        | 3   | 45.12 $\pm$ 5.50<br>(38.86-49.20)     | 31.99 $\pm$ 11.53<br>(21.34-44.24)  | 9.673 $\pm$ 4.56<br>(6.00-26.53)    | 7.01 $\pm$ 3.75<br>(3.84-11.16)    | 70.97 $\pm$ 6.13<br>(64.02-75.58)  | 158.13 $\pm$ 8.56<br>(152.01-167.91)  | 28.63 $\pm$ 3.45<br>(24.94-31.77)  |
| <i>S. empusa</i>         | 2   | 37.63 $\pm$ 2.04<br>(36.18-39.07)     | 28.57 $\pm$ 4.82<br>(25.16-31.98)   | 9.74 $\pm$ 3.29<br>(7.42-12.06)     | 5.72 $\pm$ 2.49<br>(3.96-7.48)     | 57.73 $\pm$ 5.98<br>(53.50-61.96)  | 97.41 $\pm$ 15.24<br>(86.63-108.18)   | 21.16 $\pm$ 3.87<br>(18.43-23.90)  |

Table 3. The ratios of spring parameters to merus length (ML) across species. Results are presented as mean  $\pm$  standard deviation. \*one individual was missing body size data. N is the number of individuals tested per species. When two appendages were tested per individual, those two values are averaged to form one value for that individual. Row colors indicate appendage type (smashers: white; undifferentiated: dark-gray; spearers: light-gray).

| Species                  | N   | Spring constant/ML (N mm <sup>-1</sup> ) | Max force/ML (N mm <sup>-1</sup> ) | Work: load/ML (mJ mm <sup>-1</sup> ) | Work: unload/ML (mJ mm <sup>-1</sup> ) | Resilience/ML (% mm <sup>-1</sup> ) |
|--------------------------|-----|------------------------------------------|------------------------------------|--------------------------------------|----------------------------------------|-------------------------------------|
| <i>G. falcatus</i>       | 18  | 5.02 $\pm$ 2.46                          | 1.80 $\pm$ 0.35                    | 0.37 $\pm$ 0.14                      | 0.27 $\pm$ 0.10                        | 5.51 $\pm$ 1.05                     |
| <i>G. chiragra</i>       | 10* | 2.90 $\pm$ 1.34                          | 1.94 $\pm$ 0.46                    | 0.64 $\pm$ 0.23                      | 0.49 $\pm$ 0.22                        | 4.15 $\pm$ 0.64                     |
| <i>G. smithii</i>        | 11  | 2.13 $\pm$ 0.81                          | 2.15 $\pm$ 0.54                    | 0.90 $\pm$ 0.30                      | 0.70 $\pm$ 0.25                        | 4.24 $\pm$ 0.50                     |
| <i>N. bredini</i>        | 1   | 2.25                                     | 1.67                               | 0.47                                 | 0.36                                   | 6.41                                |
| <i>N. festae</i>         | 1   | 3.27                                     | 1.65                               | 0.35                                 | 0.29                                   | 7.55                                |
| <i>N. oerstedii</i>      | 6   | 2.63 $\pm$ 1.33                          | 1.60 $\pm$ 0.85                    | 0.47 $\pm$ 0.25                      | 0.33 $\pm$ 0.17                        | 4.97 $\pm$ 0.77                     |
| <i>N. wennerae</i>       | 2   | 2.74 $\pm$ 0.43                          | 1.69 $\pm$ 0.23                    | 0.48 $\pm$ 0.05                      | 0.36 $\pm$ 0.03                        | 4.65 $\pm$ 0.32                     |
| <i>H. californiensis</i> | 3   | 1.20 $\pm$ 0.16                          | 2.42 $\pm$ 0.53                    | 2.38 $\pm$ 0.92                      | 1.71 $\pm$ 0.77                        | 2.43 $\pm$ 0.62                     |
| <i>L. maculata</i>       | 5   | 1.05 $\pm$ 0.16                          | 1.94 $\pm$ 0.51                    | 1.31 $\pm$ 0.52                      | 1.08 $\pm$ 0.44                        | 2.00 $\pm$ 0.58                     |
| <i>L. sulcata</i>        | 3   | 1.60 $\pm$ 0.34                          | 1.14 $\pm$ 0.43                    | 0.34 $\pm$ 0.16                      | 0.25 $\pm$ 0.13                        | 2.52 $\pm$ 0.47                     |
| <i>S. empusa</i>         | 2   | 1.82 $\pm$ 0.43                          | 1.35 $\pm$ 0.02                    | 0.45 $\pm$ 0.07                      | 0.26 $\pm$ 0.07                        | 2.75 $\pm$ 0.22                     |

Table 4. The relationships between merus length as the independent variable and spring characteristics as the dependent variables across species, calculated using Phylogenetic Generalized Least Squares with mean species values. The statistical results apply to the coefficient. None of the intercepts are significantly different from zero, except for resilience ( $t=13.043$ ,  $p=0.0000$ ). Statistically significant values are indicated in bold. The results of using the combined males and females dataset are presented here; males only and females only datasets yield qualitatively similar results with the exception of resilience in females ( $\lambda=1$  ; intercept: 60.7; coeff.: 0.71; std.err.: 0.15;  $p=0.0045$  ).  $\lambda$  represents phylogenetic correlation ranging from 0 (no phylogenetic signal) to 1 (Brownian motion) (Freckleton et al., 2002; Pagel, 1999).  $\lambda$  is 0 for the data shown here.

|                                            | Intercept | Coefficient | Standard error | t-value       | P-value       |
|--------------------------------------------|-----------|-------------|----------------|---------------|---------------|
| <b>Spring constant (N mm<sup>-1</sup>)</b> | 37.93     | 0.17        | 0.39           | 0.4403        | 0.6713        |
| <b>Maximum force (N)</b>                   | -6.17     | <b>2.09</b> | <b>0.36</b>    | <b>5.8498</b> | <b>0.0004</b> |
| <b>Work: load (mJ)</b>                     | -21.69    | <b>1.97</b> | <b>0.53</b>    | <b>3.6819</b> | <b>0.0062</b> |
| <b>Work: unload (mJ)</b>                   | -17.87    | <b>1.56</b> | <b>0.39</b>    | <b>4.0265</b> | <b>0.0038</b> |
| <b>Resilience (%)</b>                      | 70.68     | 0.11        | 0.24           | 0.4758        | 0.6470        |

Table 5. The scaling of spring characteristics relative to merus length within each species using a least-squares linear regression. Statistically significant values are indicated in bold. *L. maculata* (gray) is a spearer; the remaining species are smashers.

|                                       | Species          | Intercept     | Slope        | F-statistic  | df          | P-value       | R <sup>2</sup> |
|---------------------------------------|------------------|---------------|--------------|--------------|-------------|---------------|----------------|
| Spring constant (N mm <sup>-1</sup> ) | <i>falcatus</i>  | <b>121.35</b> | <b>-4.11</b> | <b>5.14</b>  | <b>1,16</b> | <b>0.0376</b> | <b>0.2431</b>  |
|                                       | <i>chiragra</i>  | <b>176.66</b> | <b>-7.07</b> | <b>13.74</b> | <b>1,7</b>  | <b>0.0076</b> | <b>0.6625</b>  |
|                                       | <i>smithii</i>   | 88.33         | -2.68        | 0.79         | 1,9         | 0.3960        | 0.0811         |
|                                       | <i>oerstedii</i> | 84.73         | -3.49        | 1.01         | 1,4         | 0.3713        | 0.2019         |
|                                       | <i>maculata</i>  | <b>-15.68</b> | <b>1.43</b>  | <b>20.24</b> | <b>1,3</b>  | <b>0.0205</b> | <b>0.8709</b>  |
| Maximum force (N)                     | <i>falcatus</i>  | <b>-4.37</b>  | <b>2.12</b>  | <b>19.59</b> | <b>1,16</b> | <b>0.0004</b> | <b>0.5504</b>  |
|                                       | <i>chiragra</i>  | 41.92         | -0.42        | 0.15         | 1,7         | 0.7134        | 0.0205         |
|                                       | <i>smithii</i>   | -24.45        | 3.48         | 2.67         | 1,9         | 0.1364        | 0.2291         |
|                                       | <i>oerstedii</i> | 38.90         | -1.21        | 0.24         | 1,4         | 0.6517        | 0.0560         |
|                                       | <i>maculata</i>  | <b>-41.03</b> | <b>2.95</b>  | <b>8.23</b>  | <b>1,3</b>  | <b>0.0642</b> | <b>0.7327</b>  |
| Work: load (mJ)                       | <i>falcatus</i>  | <b>-7.90</b>  | <b>0.96</b>  | <b>43.27</b> | <b>1,16</b> | <b>0.0000</b> | <b>0.7301</b>  |
|                                       | <i>chiragra</i>  | -9.71         | 1.19         | 3.69         | 1,7         | 0.0964        | 0.3449         |
|                                       | <i>smithii</i>   | <b>-35.54</b> | <b>2.84</b>  | <b>7.16</b>  | <b>1,9</b>  | <b>0.0254</b> | <b>0.4429</b>  |
|                                       | <i>oerstedii</i> | 6.92          | -0.03        | 0.00         | 1,4         | 0.9708        | 0.0004         |
|                                       | <i>maculata</i>  | <b>-47.59</b> | <b>2.47</b>  | <b>6.05</b>  | <b>1,3</b>  | <b>0.0908</b> | <b>0.6686</b>  |
| Work: unload (mJ)                     | <i>falcatus</i>  | <b>-5.58</b>  | <b>0.69</b>  | <b>43.45</b> | <b>1,16</b> | <b>0.0000</b> | <b>0.7309</b>  |
|                                       | <i>chiragra</i>  | -12.17        | 1.17         | 4.06         | 1,7         | 0.0836        | 0.3673         |
|                                       | <i>smithii</i>   | <b>-34.76</b> | <b>2.60</b>  | <b>9.00</b>  | <b>1,9</b>  | <b>0.0150</b> | <b>0.4999</b>  |
|                                       | <i>oerstedii</i> | 2.56          | 0.14         | 0.06         | 1,4         | 0.8162        | 0.0152         |
|                                       | <i>maculata</i>  | <b>-38.09</b> | <b>2.01</b>  | <b>5.39</b>  | <b>1,3</b>  | <b>0.1028</b> | <b>0.6426</b>  |
| Resilience (%)                        | <i>falcatus</i>  | 73.27         | 0.02         | 0.00         | 1,16        | 0.9713        | 0.0001         |
|                                       | <i>chiragra</i>  | 34.19         | 2.22         | 1.61         | 1,7         | 0.2446        | 0.1873         |
|                                       | <i>smithii</i>   | 52.04         | 1.40         | 0.57         | 1,9         | 0.4712        | 0.0591         |
|                                       | <i>oerstedii</i> | 46.73         | 1.60         | 0.54         | 1,4         | 0.5028        | 0.1191         |
|                                       | <i>maculata</i>  | 79.92         | 0.06         | 0.04         | 1,3         | 0.8479        | 0.0143         |

Table 6. The effects of cutting the saddle on spring characteristics across species. Paired t-tests were performed, except when data were not normally distributed. \*In this latter case, a paired Wilcoxon signed rank test was performed (indicated by “V=”) in the t-value column. Statistically significant values are indicated in bold. *L. maculata* is a spearer (gray); the remaining species are smashers.

|                                       | Species          | t-value*       | df        | P-value       | Mean of differences |
|---------------------------------------|------------------|----------------|-----------|---------------|---------------------|
| Spring constant (N mm <sup>-1</sup> ) | <i>falcatus</i>  | <b>4.2373</b>  | <b>13</b> | <b>0.0010</b> | <b>4.45</b>         |
|                                       | <i>chiragra</i>  | 0.6211         | 9         | 0.5499        | 1.07                |
|                                       | <i>smithii</i>   | -1.2008        | 10        | 0.2575        | -1.18               |
|                                       | <i>oerstedii</i> | 1.3386         | 5         | 0.2383        | 8.01                |
|                                       | <i>maculata</i>  | -1.7609        | 3         | 0.1765        | -14.25              |
| Maximum force (N)                     | <i>falcatus</i>  | <b>8.0989</b>  | <b>13</b> | <b>0.0000</b> | <b>3.60</b>         |
|                                       | <i>chiragra</i>  | <b>6.1219</b>  | <b>9</b>  | <b>0.0002</b> | <b>5.31</b>         |
|                                       | <i>smithii</i>   | V = 61         |           | <b>0.0098</b> | <b>4.23</b>         |
|                                       | <i>oerstedii</i> | 1.7444         | 5         | 0.1415        | 6.46                |
|                                       | <i>maculata</i>  | V = 1          |           | 0.2500        | -32.05              |
| Work: load (mJ)                       | <i>falcatus</i>  | <b>5.6182</b>  | <b>13</b> | <b>0.0001</b> | <b>0.99</b>         |
|                                       | <i>chiragra</i>  | <b>4.6379</b>  | <b>9</b>  | <b>0.0012</b> | <b>2.38</b>         |
|                                       | <i>smithii</i>   | <b>3.413</b>   | <b>10</b> | <b>0.0066</b> | <b>2.37</b>         |
|                                       | <i>oerstedii</i> | 1.9583         | 5         | 0.1075        | 1.96                |
|                                       | <i>maculata</i>  | -2.1381        | 3         | 0.1221        | -21.75              |
| Work: unload (mJ)                     | <i>falcatus</i>  | <b>4.5751</b>  | <b>13</b> | <b>0.0005</b> | <b>0.59</b>         |
|                                       | <i>chiragra</i>  | <b>4.0228</b>  | <b>9</b>  | <b>0.0030</b> | <b>1.58</b>         |
|                                       | <i>smithii</i>   | <b>2.9778</b>  | <b>10</b> | <b>0.0139</b> | <b>1.84</b>         |
|                                       | <i>oerstedii</i> | 1.8299         | 5         | 0.1268        | 1.24                |
|                                       | <i>maculata</i>  | -2.0155        | 3         | 0.1372        | -18.06              |
| Resilience (%)                        | <i>falcatus</i>  | <b>-3.7337</b> | <b>13</b> | <b>0.0025</b> | <b>-2.57</b>        |
|                                       | <i>chiragra</i>  | <b>-3.2098</b> | <b>9</b>  | <b>0.0107</b> | <b>-1.98</b>        |
|                                       | <i>smithii</i>   | -0.3516        | 10        | 0.7324        | -0.53               |
|                                       | <i>oerstedii</i> | -1.8154        | 5         | 0.1292        | -2.79               |
|                                       | <i>maculata</i>  | 0.2508         | 3         | 0.8182        | 0.37                |

Table 7. Percent change in spring parameter after the saddle was severed; negative values indicate a decrease after the saddle was cut. Individual values were calculated and then averaged to generate species means. Row colors indicate appendage type (smashers: white; undifferentiated: dark-gray; spears: light-gray).

| <b>Species</b>        | <b>n</b> | <b>Spring constant</b> | <b>Maximum force</b> | <b>Work: load</b> | <b>Work: unload</b> | <b>Resilience</b> |
|-----------------------|----------|------------------------|----------------------|-------------------|---------------------|-------------------|
| <i>falcatus</i>       | 14       | -6.5                   | -13.4                | -15.8             | -12.7               | 3.6               |
| <i>chiragra</i>       | 9        | -0.4                   | -16.4                | -21.3             | -19.4               | 2.5               |
| <i>smithii</i>        | 11       | 4.0                    | -10.0                | -13.3             | -12.6               | 0.8               |
| <i>bredini</i>        | 1        | -3.2                   | -23.1                | -27.5             | -27.0               | 0.5               |
| <i>festae</i>         | 1        | 6.0                    | -15.8                | -21.0             | -22.4               | -1.7              |
| <i>oerstedii</i>      | 6        | -13.5                  | -21.8                | -24.3             | -20.1               | 4.6               |
| <i>wennerae</i>       | 2        | -15.5                  | -7.7                 | -0.7              | 8.4                 | 8.9               |
| <i>californiensis</i> | 1        | -17.1                  | -21.5                | -21.0             | -18.9               | 2.6               |
| <i>maculata</i>       | 4        | -27.7                  | -35.0                | -34.7             | -34.3               | 0.5               |
| <i>sulcata</i>        | 1        | -38.6                  | -20.3                | -1.3              | -1.5                | -0.4              |
| <i>empusa</i>         | 2        | -33.5                  | -30.1                | -28.1             | -19.5               | 11.7              |

Table 8. The scaling of spring characteristics relative to merus length in two different datasets - one including only species with spears and the other consisting of species with hammers. The analyses were calculated using Phylogenetic Generalized Least Squares with mean species values. The statistical results apply to the coefficient. None of the intercepts are significantly different from zero, except for the spring constant in spearers ( $t=6.23$ ,  $p=0.0248$ ) and resilience in species with hammers ( $t=8.08$ ,  $p=0.0013$ ).  $\lambda$  represents phylogenetic correlation ranging from 0 (no phylogenetic signal) to 1 (Brownian motion) (Freckleton et al., 2002; Pagel, 1999). Assumptions were violated for the resilience calculation in spearers, so those values are not included. Row colors indicate appendage type (smashers: white; spearers: light-gray). Statistically significant values are indicated in bold.

|                                            | Intercept     | Coefficient | Standard error | t-value     | P-value       | $\lambda$ |
|--------------------------------------------|---------------|-------------|----------------|-------------|---------------|-----------|
| <b>Spring constant (N mm<sup>-1</sup>)</b> | 33.23         | 0.51        | 1.98           | 0.26        | 0.8083        | 1         |
|                                            | 27.47         | 0.40        | 0.09           | 4.26        | 0.0509        | 1         |
| <b>Maximum force (N)</b>                   | <b>-14.58</b> | <b>2.77</b> | <b>0.46</b>    | <b>6.01</b> | <b>0.0039</b> | <b>0</b>  |
|                                            | <b>-18.58</b> | <b>2.65</b> | <b>0.37</b>    | <b>7.07</b> | <b>0.0194</b> | <b>1</b>  |
| <b>Work: load (mJ)</b>                     | <b>-13.78</b> | <b>1.48</b> | <b>0.40</b>    | <b>3.73</b> | <b>0.0203</b> | <b>0</b>  |
|                                            | -16.28        | 2.27        | 0.58           | 3.89        | 0.0602        | 1         |
| <b>Work: unload (mJ)</b>                   | <b>-11.16</b> | <b>1.17</b> | <b>0.33</b>    | <b>3.52</b> | <b>0.0244</b> | <b>0</b>  |
|                                            | <b>-21.36</b> | <b>1.97</b> | <b>0.42</b>    | <b>4.73</b> | <b>0.0419</b> | <b>1</b>  |
| <b>Resilience (%)</b>                      | 72.94         | 0.11        | 0.59           | 0.19        | 0.8574        | 0         |
|                                            | na            | na          | na             | na          | na            | na        |



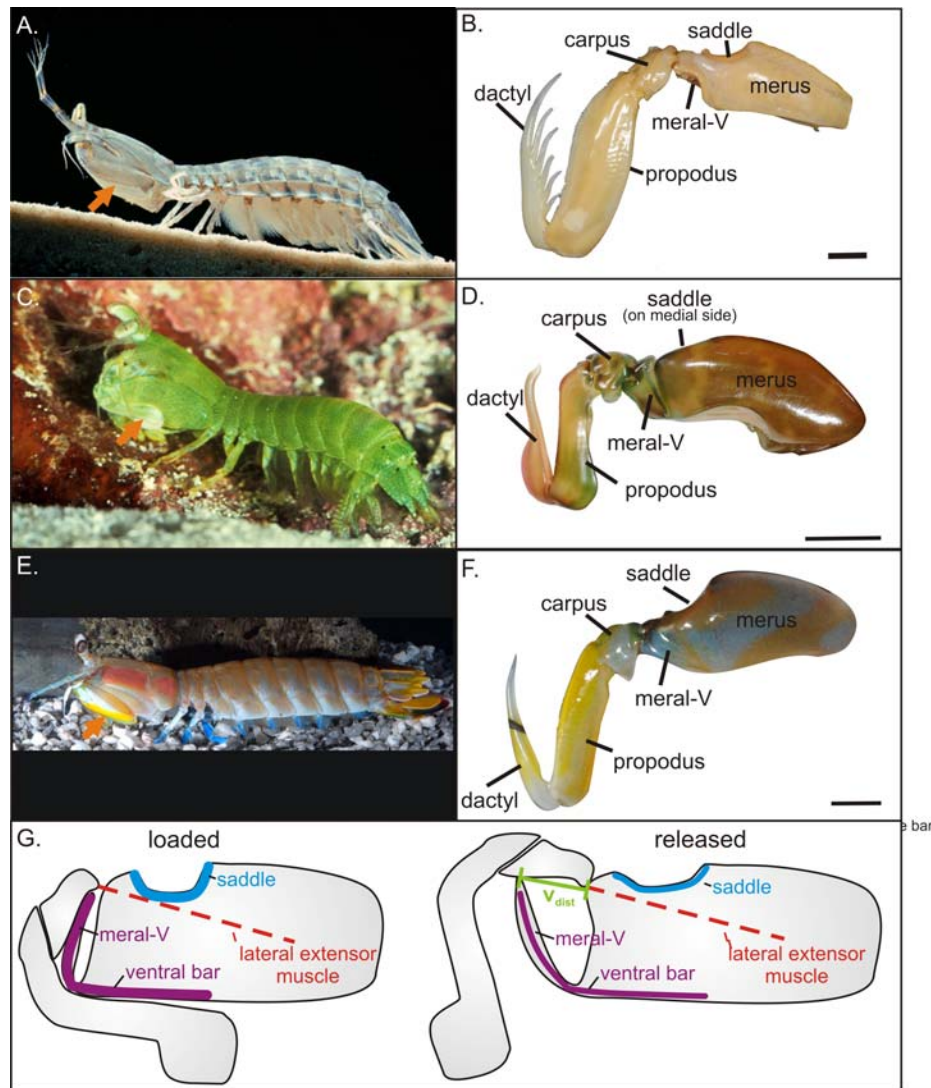

Figure 1. Regardless of appendage type, mantis shrimp share the same basic components of an elastic mechanism found in the merus segment of the raptorial appendages. Spearers, e.g., *Squilla empusa* (A), have an elongate raptorial appendage (B) used for capturing evasive prey. Smashers, e.g., *Gonodactylaceus falcatus* (C), use a hammer-shaped dactyl (D) to smash hard-shelled prey. Undifferentiated taxa, e.g., *Hemisquilla californiensis* (E), use an undifferentiated dactyl (F) to dislodge and process hard-shelled prey (black bar on dactyl is a forcep). A schematic (G) shows an appendage loaded in advance of a strike (left) with the meral-V and saddle compressed through the action of the merus extensor muscles (red dashed line). When released (right), the meral-V and saddle rapidly extend back to their resting state and the meral-V pushes the appendage distally toward the target. When tested in a materials testing machine, a wire was attached and oriented in the same position as the extensor muscle to compress the elastic mechanism similarly to live mantis shrimp. The amount of compression applied by the materials testing machine was determined by the opening between the meral-V and proximal merus ( $V_{\text{dist}}$ ) in the released position. Arrows in animal photos indicate raptorial appendage. Raptorial appendage photos are lateral views of the left appendage. Scale bars are 5 mm. To experience a more detailed perspective of these different appendages types, a supplementary video of rotating, rendered micro-CT scans is available online.

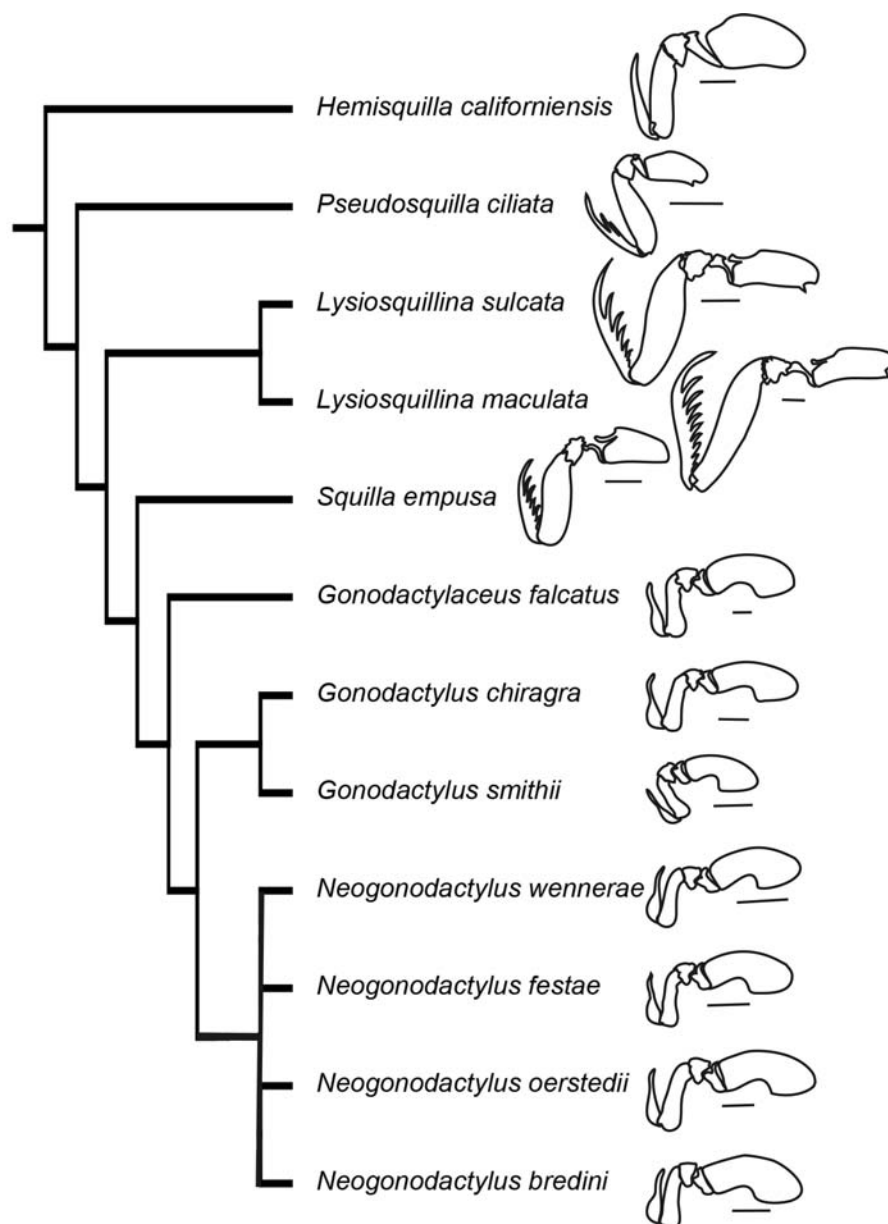

Figure 2. Twelve mantis shrimp species were tested in this study, including an undifferentiated basal species, *H. californiensis* (scale bar = 1 cm), four spearing species (*P. ciliata*, *L. sulcata*, *L. maculata* and *S. empusa*; scale bar = 1 cm) and seven smashing species (*G. falcatus*, *G. chiragra*, *G. smithii*, *N. wenerae*, *N. festae*, *N. oerstedii*, *N. bredini*; scale bar = 5 mm). Tree topology and branch lengths (not depicted here) are from the maximum likelihood phylogeny presented in Porter *et al.* (Porter *et al.*, 2010) with the taxa not tested here pruned from the original tree. *N. wenerae* was added to the tree based on the topology for the genus *Neogonodactylus* in Cheroske *et al.* (Cheroske *et al.*, 2006). All of *P. ciliata*'s appendages broke during the tests so those results are not included in the phylogenetic analyses. *N. festae* is placed on this tree for illustrative purposes; it is not included in the phylogenetic analyses, because of the uncertainty in its phylogenetic position. Lateral views of the raptorial appendages are shown.

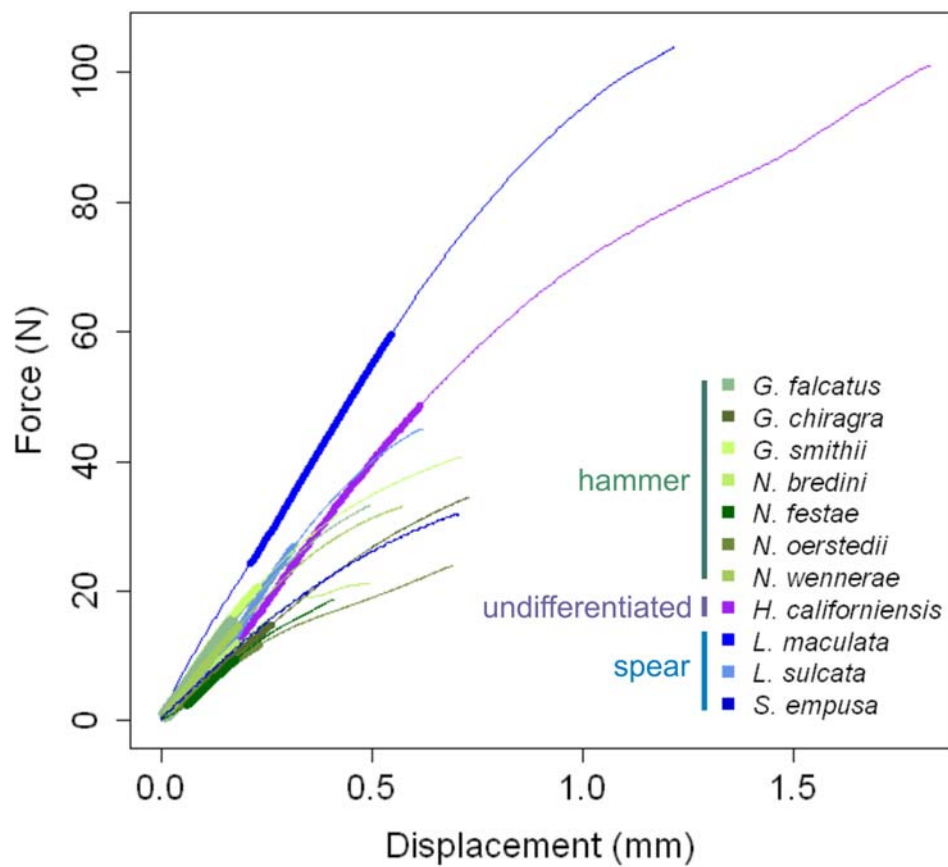

**Figure 3.** Representative force displacement curves are shown in each species for which spring compression tests were successfully performed. The thin lines show the displacement from onset of the test to maximum force. The thick lines show the location of maximum slope (spring constant).

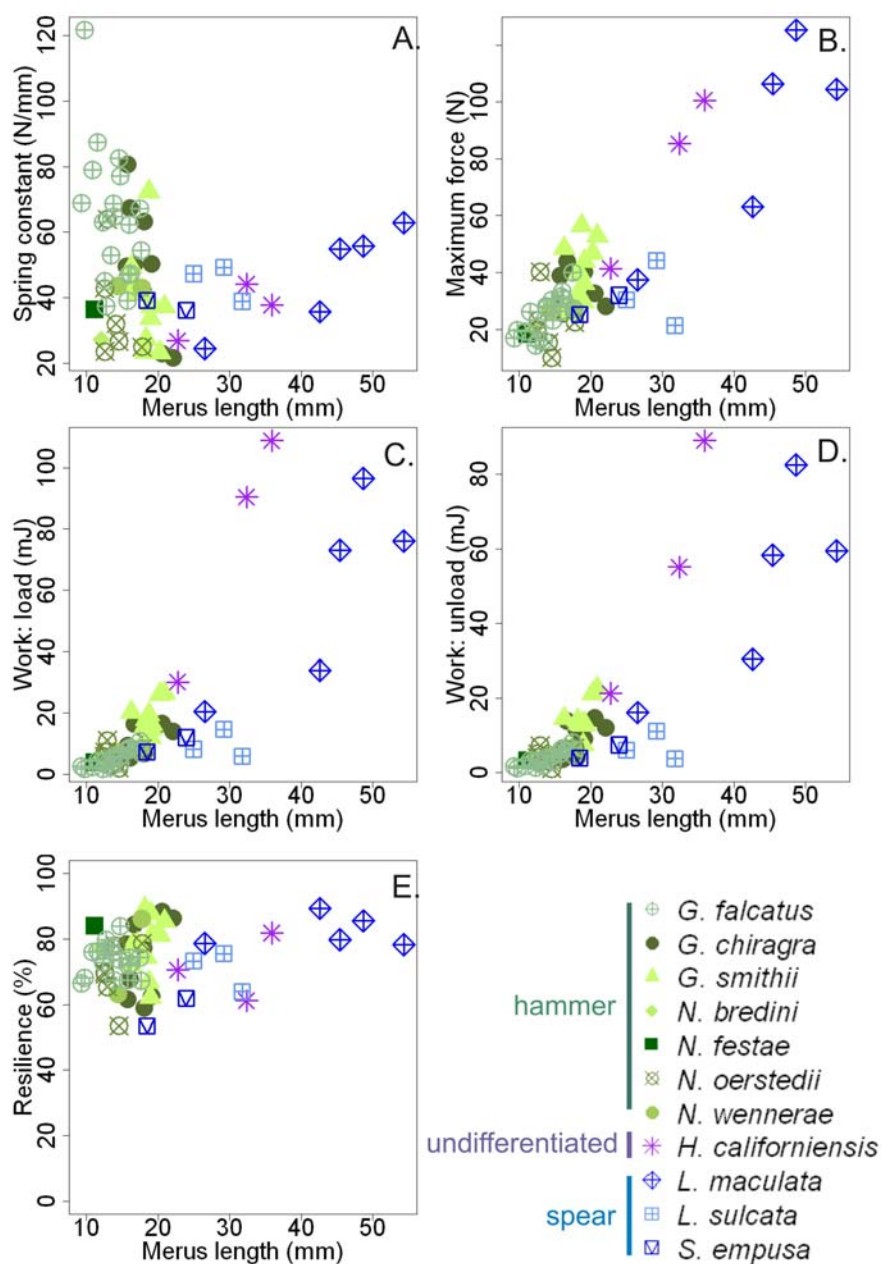

Figure 4. The scaling of spring characteristics across species. Each graph shows mean values for each individual within each species using the color-shape scheme shown in the legend.

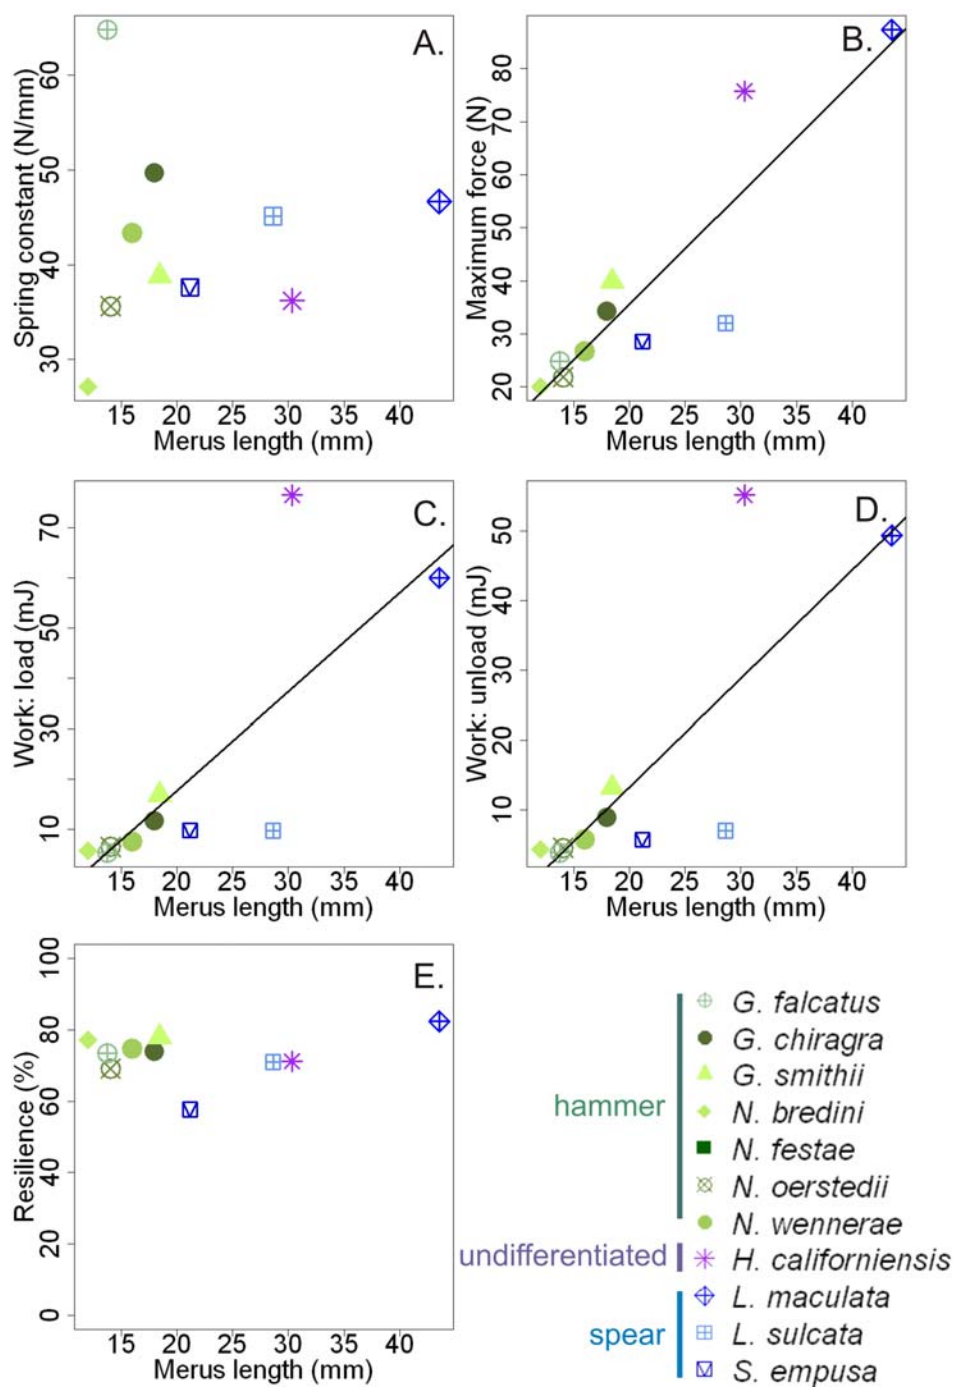

Figure 5. Cross-species scaling relationships were statistically analyzed using phylogenetic comparative analyses. The values shown here are the means for each species (color-shape scheme in legend) with males and females combined. The lines are calculated using PGLS. Given that these values exhibited  $\lambda=0$  (no phylogenetic signal), the lines are equivalent to a regression on the raw data.

## REFERENCES CITED

- Ahyong, S. T.** (2001). Revision of the Australian Stomatopod Crustacea. Sydney: Australian Museum.
- Ahyong, S. T. and Harling, C.** (2000). The phylogeny of the stomatopod Crustacea. *Australian Journal of Zoology* **48**, 607-642.
- Ahyong, S. T. and Jarman, S. N.** (2009). Stomatopod interrelationships: preliminary results based on analysis of three molecular loci. *Arthropod Systematics & Phylogeny* **67**, 91-98.
- Alexander, R. M.** (1988). Elastic mechanisms in animal movement. New York: Cambridge University Press.
- Alexander, R. M.** (2003). Principles of animal locomotion. Princeton: Princeton University Press.
- Alexander, R. M. and Vernon, A.** (1975). The mechanics of hopping by kangaroos (Macropodidae). *Journal of Zoology, London* **177**, 265-303.
- Bachmann, T., Emmerlich, J., Baumgartner, W., Schneider, J. M. and Wagner, H.** (2012). Flexural stiffness of feather shafts: geometry rules over material properties. *The Journal of Experimental Biology* **215**, 405-415.
- Bennet-Clark, H. C.** (1976). Energy storage in jumping insects. In *The Insect Integument*, (ed. H. R. Hepburn), pp. 421-443. Amsterdam: Elsevier Scientific Publishing Company.
- Burrows, M.** (1969). The mechanics and neural control of the prey capture strike in the mantid shrimps *Squilla* and *Hemisquilla*. *Zeitschrift für vergleichende Physiologie* **62**, 361-381.
- Burrows, M. and Hoyle, G.** (1972). Neuromuscular physiology of the strike mechanism of the mantis shrimp, *Hemisquilla*. *Journal of Experimental Zoology* **179**, 379-394.
- Burrows, M., Shaw, S. and Sutton, G.** (2008). Resilin and chitinous cuticle form a composite structure for energy storage in jumping by froghopper insects. *BMC Biology* **6**, 41.

- Caldwell, R. L.** (1975). Ecology and evolution of agonistic behavior in Stomatopods. *Naturwissenschaften* **62**, 214-222.
- Caldwell, R. L. and Dingle, H.** (1976). Stomatopods. *Scientific American*, 81-89.
- Cheroske, A. G., Barber, P. H. and Cronin, T. W.** (2006). Evolutionary variation in the expression of phenotypically plastic color vision in Caribbean mantis shrimps, genus *Neogonodactylus*. *Marine Biology* **150**, 213-220.
- Claverie, T., Chan, E. and Patek, S. N.** (2011). Modularity and scaling in fast movements: power amplification in mantis shrimp. *Evolution* **62**, 443-461.
- Claverie, T. and Patek, S. N.** (In revision). Correlated evolution and evolutionary disparity of the power-amplified system in mantis shrimp *Evolution*.
- deVries, M. S., Murphy, E. A. K. and Patek, S. N.** (In press). Strike mechanics of an ambush predator: the spearing mantis shrimp. *Journal of Experimental Biology*.
- Freckleton, R. P., Harvey, P. H. and Pagel, M.** (2002). Phylogenetic analysis and comparative data: A test and review of evidence. *The American Naturalist* **160**, 712-726.
- Hayashi, M., Feilich, K. L. and Ellerby, D. J.** (2009). The mechanics of explosive seed dispersal in orange jewelweed (*Impatiens capensis*). *Journal of Experimental Botany* **60**, 2045-2053.
- Hayashi, M., Gerry, S. P. and Ellerby, D. J.** (2010). The seed dispersal catapult of *Cardamine parviflora* (Brassicaceae) is efficient but unreliable. *American Journal of Botany* **97**, 1595-1601.
- Heglund, N., Fedak, M., Taylor, C. and Cavagna, G.** (1982). Energetics and mechanics of terrestrial locomotion. IV. Total mechanical energy changes as a function of speed and body size in birds and mammals. *Journal of Experimental Biology* **97**, 57-66.
- Katz, S. L. and Gosline, J. M.** (1992). Ontogenetic scaling and mechanical behaviour of the tibiae of the African desert locust (*Schistocerca gregaria*). *Journal of Experimental Biology* **168**, 125-150.

**Lohse, D., Schmitz, B. and Versluis, M.** (2001). Snapping shrimp make flashing bubbles. *Nature* **413**, 477-478.

**Ly, S., Dudek, D. M., Cao, Y., Balamurali, M. M., Gosline, J. and Li, H. B.** (2010). Designed biomaterials to mimic the mechanical properties of muscles. *Nature* **465**, 69-73.

**McGowan, C. P., Baudinette, R. V. and Biewener, A. A.** (2008a). Differential design for hopping in two species of wallabies. *Comparative Biochemistry and Physiology - Part A: Molecular & Integrative Physiology* **150**, 151-158.

**McGowan, C. P., Skinner, J. and Biewener, A. A.** (2008b). Hind limb scaling of kangaroos and wallabies (superfamily Macropodoidea): implications for hopping performance, safety factor and elastic savings. *Journal of Anatomy* **212**, 153-163.

**McHenry, M. J., Claverie, T., Rosario, M. V. and Patek, S. N.** (2012). Gearing for speed slows the predatory strike of a mantis shrimp. *Journal of Experimental Biology* **215**, 1231-1245.

**McNeill, P., Burrows, M. and Hoyle, G.** (1972). Fine structures of muscles controlling the strike of the mantis shrimp, *Hemisquilla*. *Journal of Experimental Zoology* **179**, 395-416.

**Nüchter, T., Benoit, M., Engel, U., Özbek, S. and Holstein, T. W.** (2006). Nanosecond-scale kinetics of nematocyst discharge. *Current Biology* **16**, R316-R318.

**Nunn, C. L.** (2011). *The Comparative Approach in Evolutionary Anthropology and Biology*. Chicago: The University of Chicago Press.

**Orme, D., Freckleton, R., Thomas, G., Petzoldt, T., Fritz, S., Isaac, N. and Pearse, W.** (2012). caper: Comparative Analyses of Phylogenetics and Evolution in R. In *R*.

**Pagel, M.** (1999). Inferring the historical patterns of biological evolution. *Nature* **401**, 877-884.

**Paradis, E., Claude, J. and Strimmer, K.** (2004). APE: analyses of phylogenetics and evolution in R. *Bioinformatics* **20**, 289-290.

**Patek, S. N., Baio, J. E., Fisher, B. F. and Suarez, A. V.** (2006). Multifunctionality and



mechanical origins: ballistic jaw propulsion in trap-jaw ants. *Proceedings of the National Academy of Sciences* **103**, 12787-12792.

**Patek, S. N. and Caldwell, R. L.** (2005). Extreme impact and cavitation forces of a biological hammer: strike forces of the peacock mantis shrimp (*Odontodactylus scyllarus*). *Journal of Experimental Biology* **208**, 3655-3664.

**Patek, S. N., Dudek, D. M. and Rosario, M. V.** (2011). From bouncy legs to poisoned arrows: elastic movements in invertebrates. *The Journal of Experimental Biology* **214**, 1973-1980.

**Patek, S. N., Korff, W. L. and Caldwell, R. L.** (2004). Deadly strike mechanism of a mantis shrimp. *Nature* **428**, 819-820.

**Patek, S. N., Nowroozi, B. N., Baio, J. E., Caldwell, R. L. and Summers, A. P.** (2007). Linkage mechanics and power amplification of the mantis shrimp's strike. *Journal of Experimental Biology* **210**, 3677 - 3688.

**Porter, M. L., Zhang, Y., Desai, S., Caldwell, R. L. and Cronin, T. W.** (2010). Evolution of anatomical and physiological specialization in the compound eyes of stomatopod crustaceans. *Journal of Experimental Biology* **213**, 3473-3486.

**R\_Core\_Team.** (2012). R: A language and environment for statistical computing. Vienna, Austria: R Foundation for Statistical Computing.

**Roberts, T. J. and Azizi, E.** (2011). Flexible mechanisms: the diverse roles of biological springs in vertebrate movement. *Journal of Experimental Biology* **214**, 353-361.

**Schram, F. R.** (2007). Paleozoic proto-mantis shrimp revisited. *Journal of Paleontology* **81**, 895-916.

**Seid, M. A., Scheffrahn, R. H. and Niven, J. E.** (2009). The rapid mandible strike of a termite soldier. *Current Biology* **18**, R1049-R1050.

**Sensenig, A. T. and Schultz, J. W.** (2004). Elastic energy storage in the pedipalpal joints of

scorpions and sun-spiders (Arachnida, Scorpiones, Solifugae). *Journal of Arachnology* **32**, 1-10.

**Sensenig, A. T. and Shultz, J. W.** (2003). Mechanics of cuticular elastic energy storage in leg joints lacking extensor muscles in arachnids. *Journal of Experimental Biology* **206**, 771-784.

**Spagna, J. C., Vakis, A. I., Schmidt, C. A., Patek, S. N., Zhang, X., Tsutsui, N. D. and Suarez, A. V.** (2008). Phylogeny, scaling, and the generation of extreme forces in trap-jaw ants. *Journal of Experimental Biology* **211**, 2358-2368.

**Tatham, A. S. and Shewry, P. R.** (2002). Comparative structures and properties of elastic proteins. *Philosophical Transactions of the Royal Society London B* **357**, 229-234.

**Versluis, M., Schmitz, B., von der Heydt, A. and Lohse, D.** (2000). How snapping shrimp snap: through cavitating bubbles. *Science* **289**, 2114-2117.

**Vogel, S.** (2005). Living in a physical world III. Getting up to speed. *Journal of Biosciences* **30**, 303-312.

**Wainwright, S. A., Biggs, W. D., Currey, J. D. and Gosline, J. M.** (1976). Mechanical design in organisms. Princeton: Princeton University Press.

**Weaver, J. C., Milliron, G. W., Miserez, A., Evans-Lutterodt, K., Herrera, S., Gallana, I., Mershon, W. J., Swanson, B., Zavattieri, P., DiMasi, E. et al.** (2012). The stomatopod dactyl club: a formidable damage-tolerant biological hammer. *Science* **336**, 1275-1280.

**Zack, T. I., Claverie, T. and Patek, S. N.** (2009). Elastic energy storage in the mantis shrimp's fast predatory strike. *Journal of Experimental Biology* **212**, 4002-4009.

**Zajac, F. E.** (1989). Muscle and tendon: properties, models, scaling, and application to biomechanics and motor control. *Critical Reviews in Biomedical Engineering* **17**, 359 - 411.

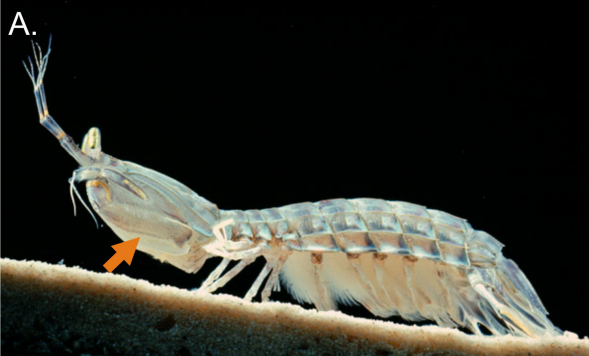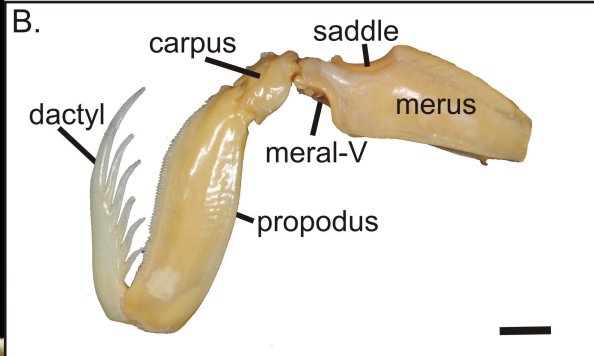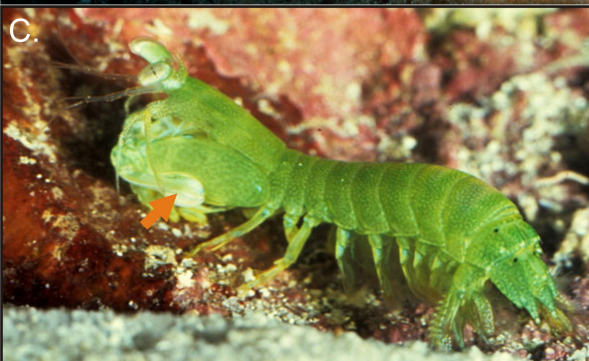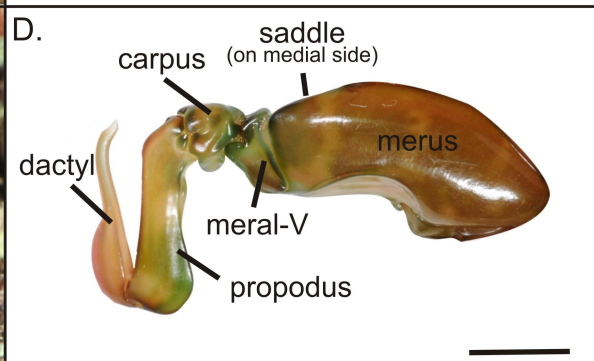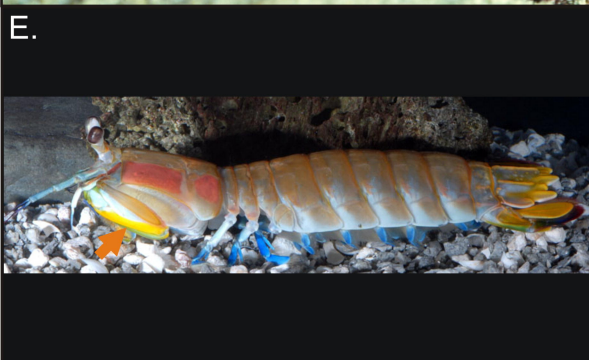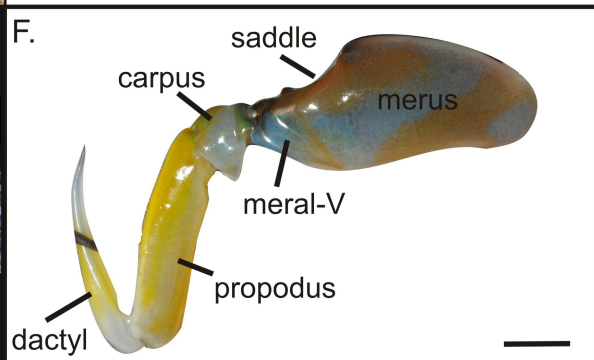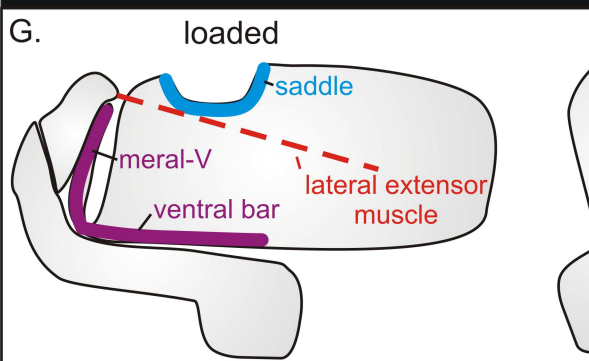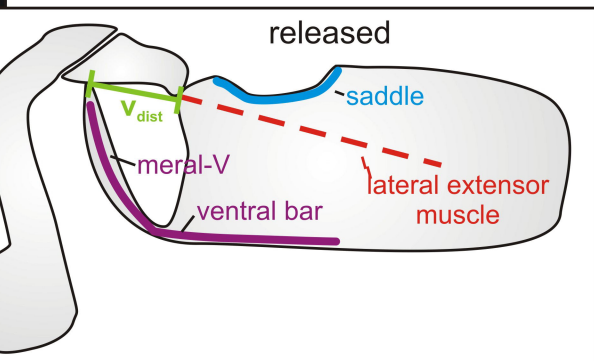

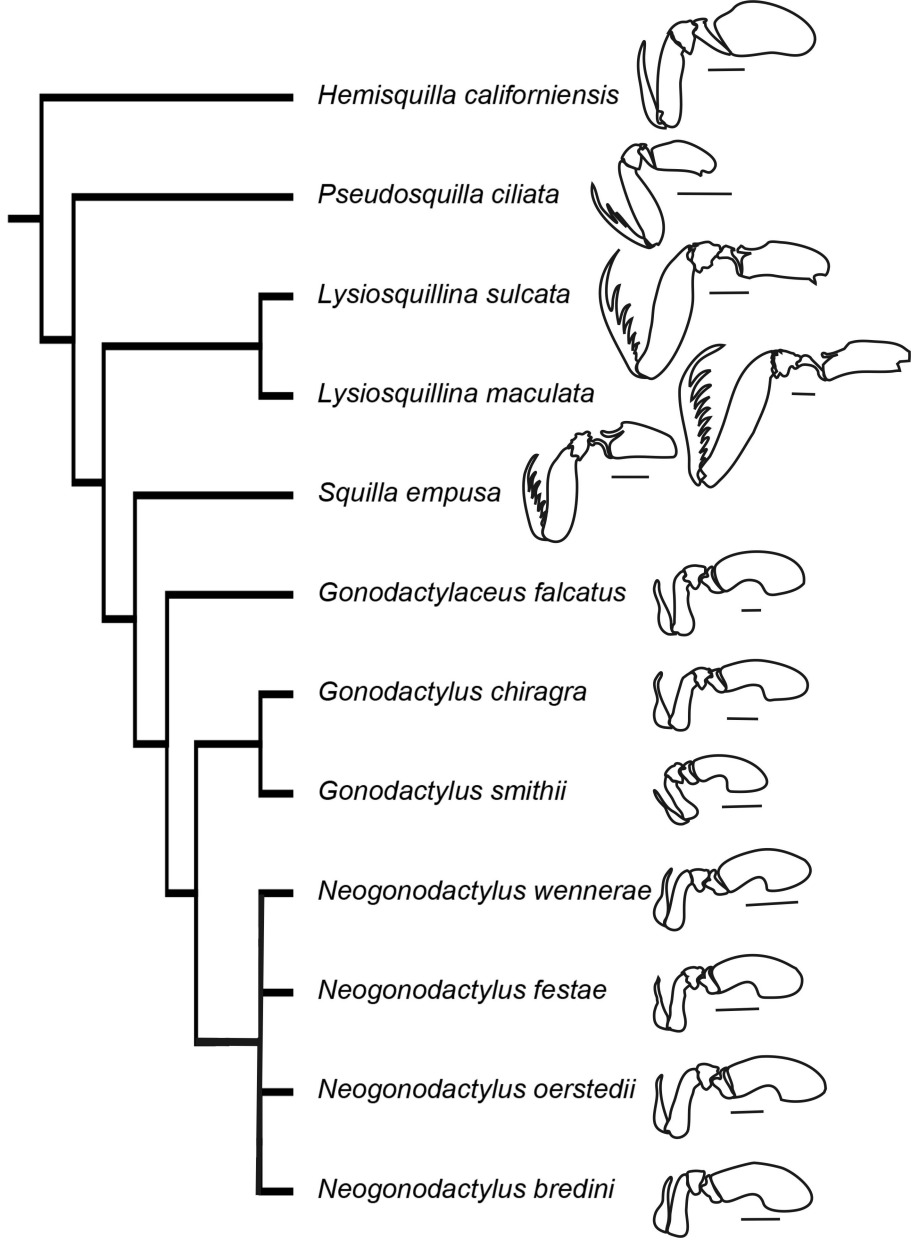

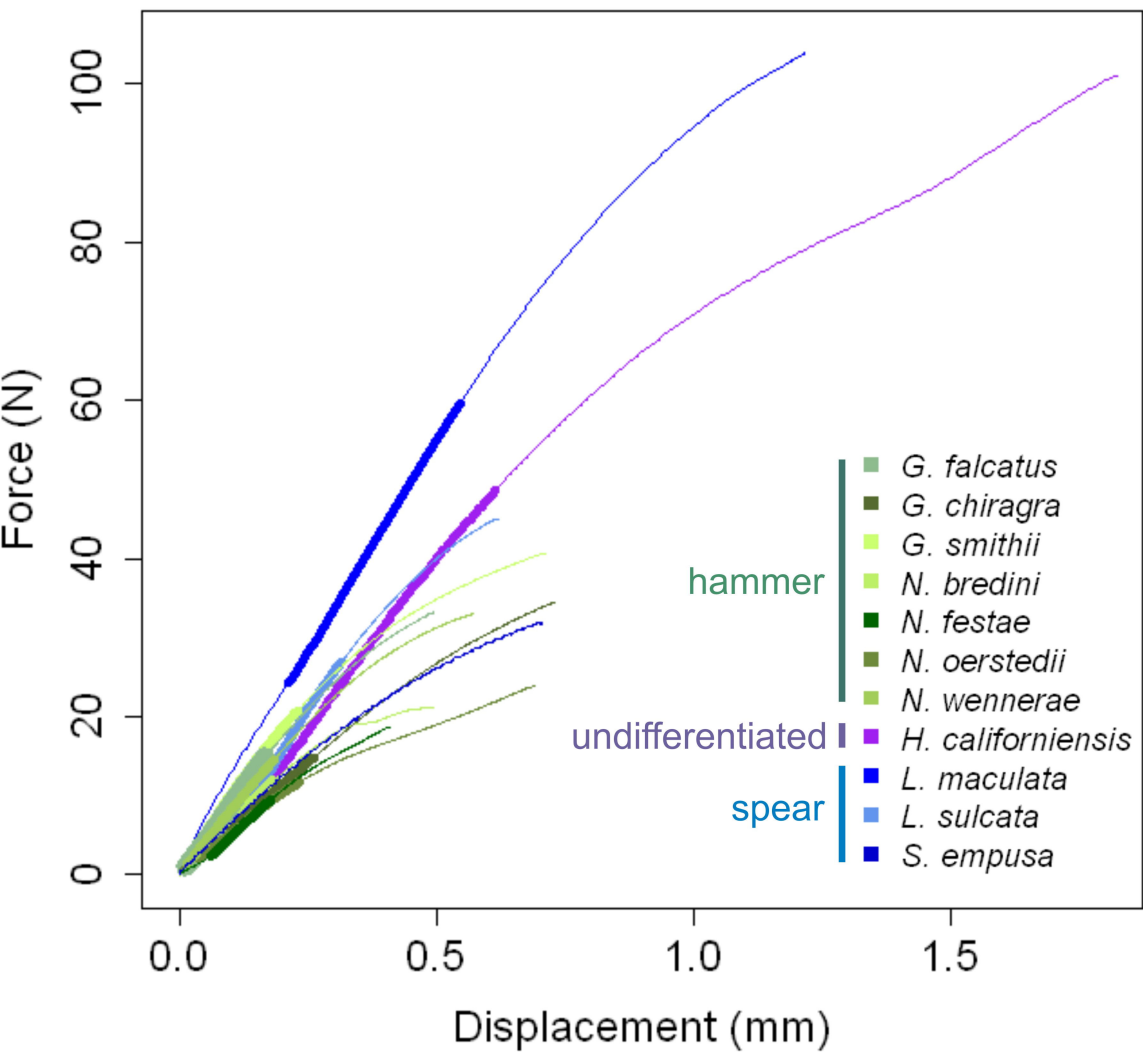

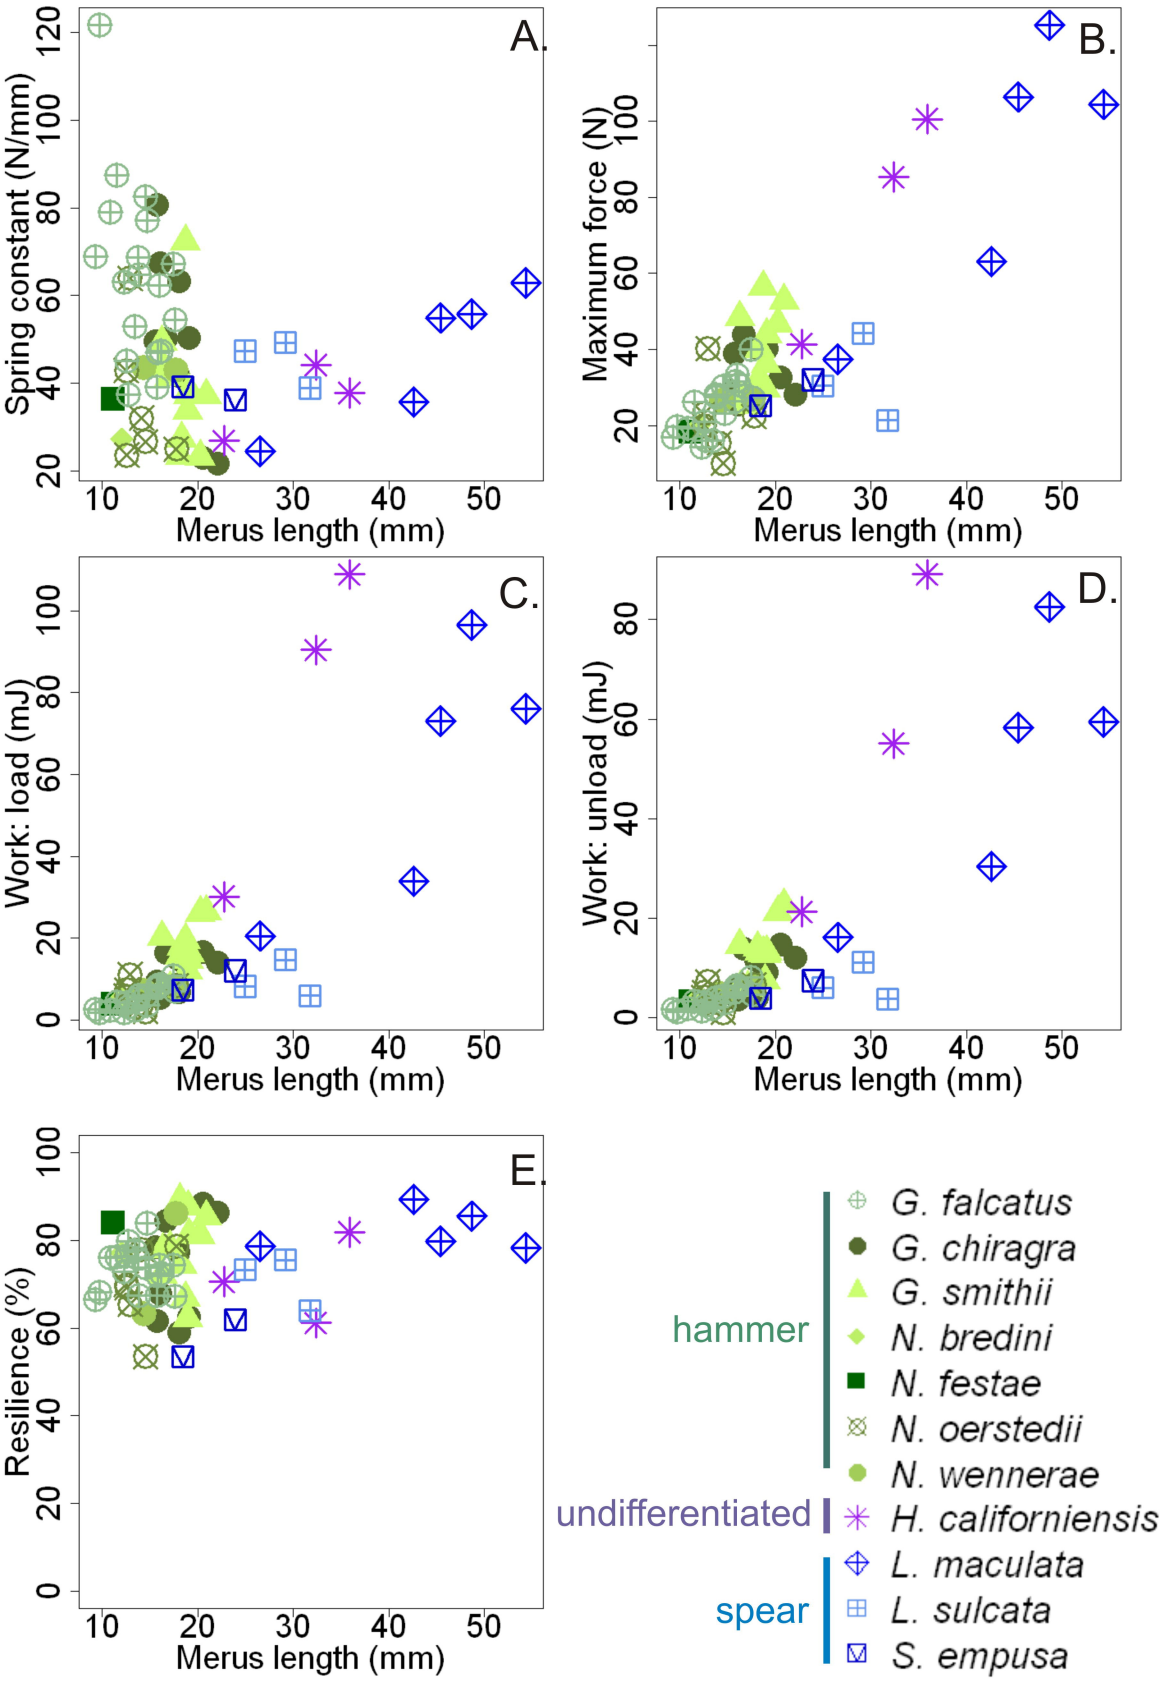

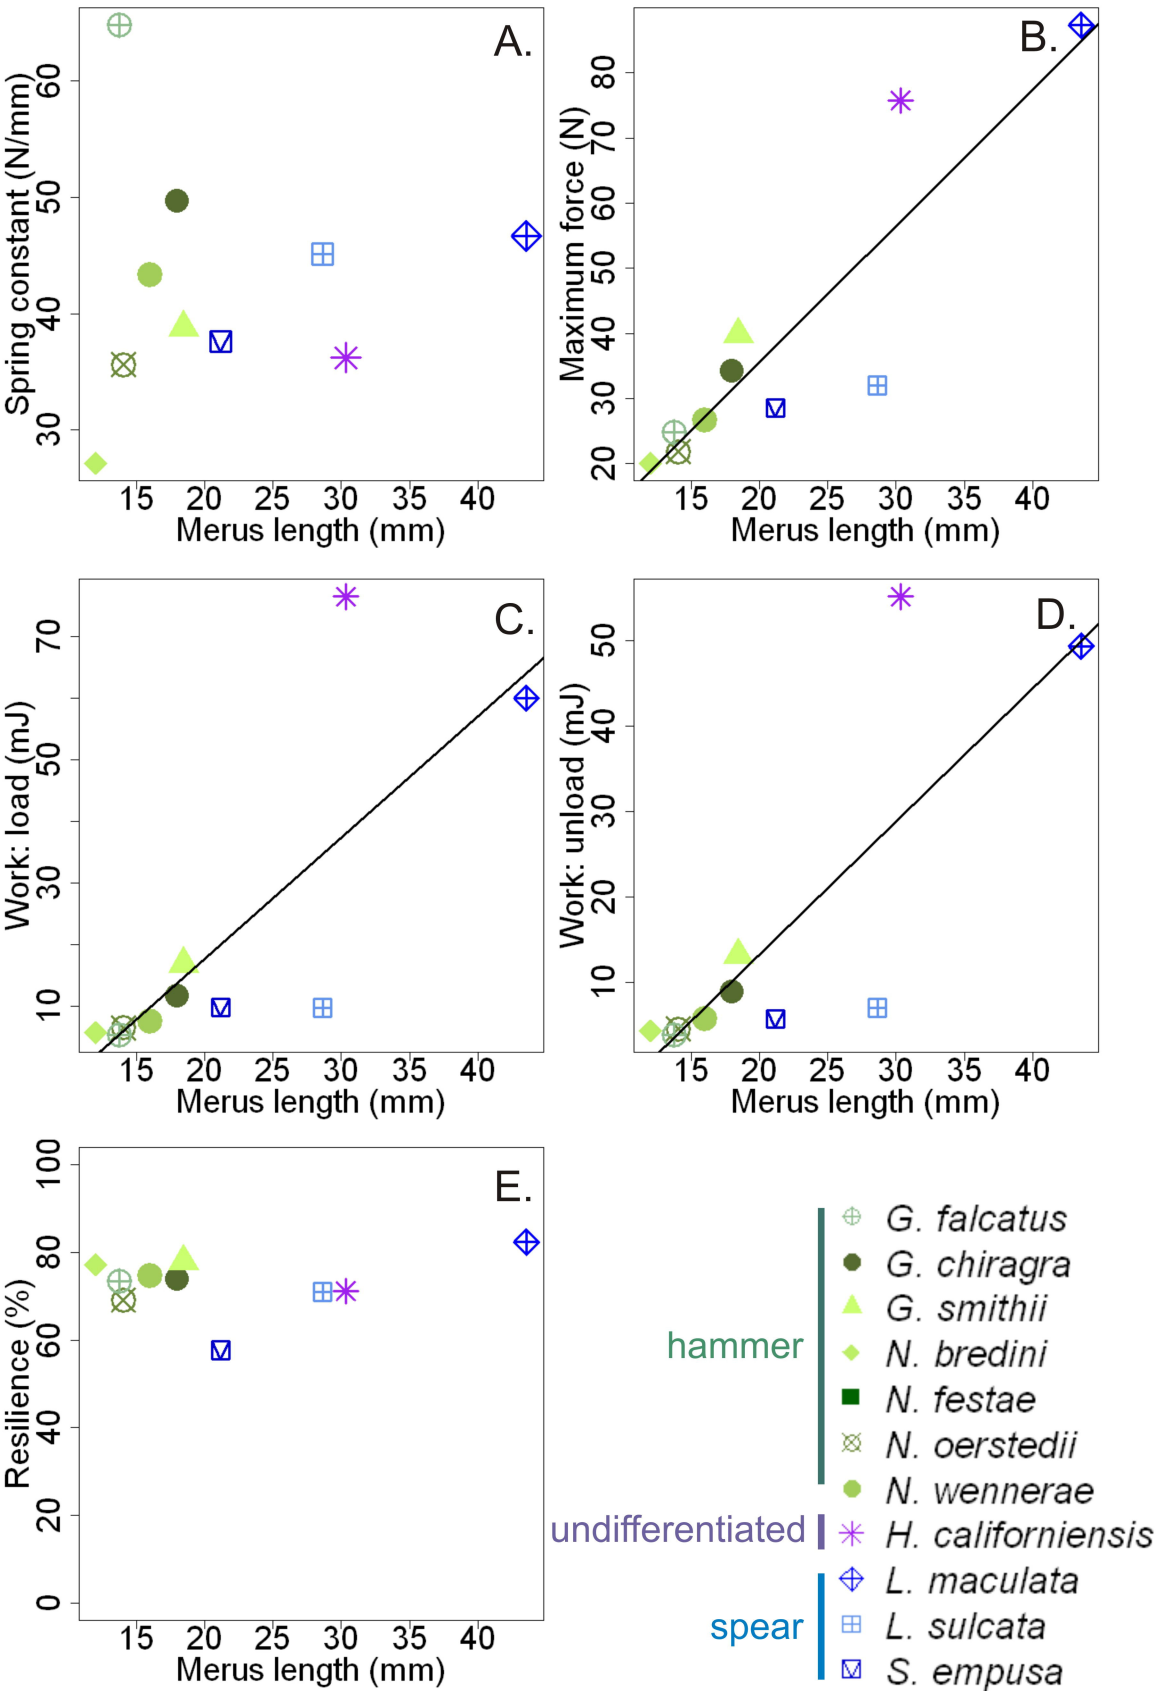

Table 1. Sample sizes, collection location, and body sizes of the species used in the study. The rate of appendage failure during materials tests is included; note that all *Pseudosquilla ciliata* failed during material testing.  $N$  is the number of individuals and  $n$  is the number of appendages tested that did not fail on the first pull.  $N_i$  and  $n_i$  are the total number of individuals and appendages tested respectively including failures. The appendage failure rate for *G. falcatus* is not reported, because failure data were not comparably recorded in the previous study (Zack et al., 2009). Row colors indicate appendage type (smashers: white; undifferentiated: dark-gray; spearers: light-gray).

| Family           | Genus                  | Species               | $N(n)$ | $N_i(n_i)$ | Mass (g)     | Carapace length (mm) | Collection location                         | Appendage failure (%) |
|------------------|------------------------|-----------------------|--------|------------|--------------|----------------------|---------------------------------------------|-----------------------|
| Gonodactylidae   | <i>Gonodactylaceus</i> | <i>falcatus</i>       | 18(18) | --         | 0.75-3.09    | 7.92-13.87           | Oahu, Hawaii                                | na                    |
| Gonodactylidae   | <i>Gonodactylus</i>    | <i>chiragra</i>       | 13(10) | 15(12)     | 3.00-11.00   | 12.43-19.39          | Lizard Island, Australia                    | 20                    |
| Gonodactylidae   | <i>Gonodactylus</i>    | <i>smithii</i>        | 12(11) | 15(14)     | 3.60-6.60    | 13.84-17.31          | Lizard Island, Australia                    | 6.7                   |
| Gonodactylidae   | <i>Neogonodactylus</i> | <i>bredini</i>        | 1(1)   | 1(1)       | 1.20         | 9.51                 | Isla Galeta, Panama                         | 0                     |
| Gonodactylidae   | <i>Neogonodactylus</i> | <i>festae</i>         | 1(1)   | 1(1)       | 1.00         | 8.58                 | Isla Naos, Panama                           | 0                     |
| Gonodactylidae   | <i>Neogonodactylus</i> | <i>oerstedii</i>      | 6(6)   | 7(7)       | 1.50-4.70    | 10.28-15.47          | Isla Galeta, Panama                         | 0                     |
| Gonodactylidae   | <i>Neogonodactylus</i> | <i>wennerae</i>       | 3(2)   | 4(3)       | 2.30-3.70    | 11.37-13.56          | Tampa Bay, Florida                          | 25                    |
| Hemisquillidae   | <i>Hemisquilla</i>     | <i>californiensis</i> | 11(3)  | 11(3)      | 29.91-102.21 | 23.71-35.55          | Santa Catalina Island, California           | 72.7                  |
| Lysiosquillidae  | <i>Lysiosquillina</i>  | <i>maculata</i>       | 5(5)   | 5(5)       | 36.50-236    | 27.45-48.42          | Lizard Island, Australia                    | 0                     |
| Lysiosquillidae  | <i>Lysiosquillina</i>  | <i>sulcata</i>        | 3(3)   | 3(3)       | 39.90-50.80  | 26.94-29.51          | Moorea, French Polynesia                    | 0                     |
| Pseudosquillidae | <i>Pseudosquilla</i>   | <i>ciliata</i>        | 4(0)   | 6(0)       | 3.81-4.88    | 14.23-15.23          | Oahu, Hawaii                                | 100                   |
| Squillidae       | <i>Squilla</i>         | <i>empusa</i>         | 2(2)   | 2(2)       | 9.72-20.30   | 18.84-23.79          | Gulf Coast Research Laboratory, Mississippi | 0                     |





Table 2. Spring characteristics and size within each species. Results are presented as mean  $\pm$  standard deviation (minimum – maximum). \*one individual was missing body size data. N is the number of individuals tested per species. When two appendages were tested per individual, those two values are averaged to form one value for that individual. Row colors indicate appendage type (smashers: white; undifferentiated: dark-gray; spearers: light-gray).

| Species                  | N   | Spring constant (N mm <sup>-1</sup> ) | Max force (N)                       | Work: load (mJ)                     | Work: unload (mJ)                  | Resilience (%)                     | Body length (mm)                      | Merus length (mm)                  |
|--------------------------|-----|---------------------------------------|-------------------------------------|-------------------------------------|------------------------------------|------------------------------------|---------------------------------------|------------------------------------|
| <i>G. falcatus</i>       | 18  | 64.78 $\pm$ 20.49<br>(37.43-121.68)   | 24.87 $\pm$ 7.04<br>(14.38-39.98)   | 5.32 $\pm$ 2.76<br>(1.89-10.88)     | 3.88 $\pm$ 1.98<br>(1.29-8.10)     | 73.51 $\pm$ 4.80<br>(66.55-84.02)  | 45.28 $\pm$ 6.66<br>(33.34-53.73)     | 13.76 $\pm$ 2.46<br>(9.32-17.57)   |
| <i>G. chiragra</i>       | 10* | 48.90 $\pm$ 18.49<br>(21.64-80.65)    | 34.17 $\pm$ 6.27<br>(25.47-43.90)   | 11.70 $\pm$ 4.28<br>(5.50-16.71)    | 8.88 $\pm$ 4.09<br>(3.73-14.77)    | 73.90 $\pm$ 10.83<br>(58.97-88.43) | 62.29 $\pm$ 8.71<br>(52.28-82.07)     | 17.96 $\pm$ 2.24<br>(15.59-22.03)  |
| <i>G. smithii</i>        | 11  | 38.80 $\pm$ 13.84<br>(23.12-72.30)    | 39.84 $\pm$ 10.69<br>(25.23-56.42)  | 16.81 $\pm$ 6.26<br>(7.85-26.53)    | 13.16 $\pm$ 5.39<br>(6.08-22.68)   | 77.92 $\pm$ 8.47<br>(62.25-89.33)  | 62.11 $\pm$ 4.70<br>(53.88-67.74)     | 18.45 $\pm$ 1.47<br>(16.24-20.89)  |
| <i>N. bredini</i>        | 1   | 27.14                                 | 20.08                               | 5.64                                | 4.35                               | 77.26                              | 38.18                                 | 12.05                              |
| <i>N. festae</i>         | 1   | 36.37                                 | 18.33                               | 3.87                                | 3.25                               | 84.02                              | 35.51                                 | 11.13                              |
| <i>N. oerstedii</i>      | 6   | 35.62 $\pm$ 15.54<br>(23.56-63.91)    | 21.85 $\pm$ 10.25<br>(10.01-40.22)  | 6.47 $\pm$ 3.26<br>(2.07-11.13)     | 4.55 $\pm$ 2.30<br>(1.11-7.26)     | 69.15 $\pm$ 9.24<br>(53.55-78.72)  | 47.49 $\pm$ 7.78<br>(39.14-61.73)     | 14.06 $\pm$ 2.00<br>(12.50-17.76)  |
| <i>N. wennerae</i>       | 2   | 43.33 $\pm$ 0.42<br>(43.03-43.63)     | 26.77 $\pm$ 0.34<br>(26.53-27.01)   | 7.58 $\pm$ 0.31<br>(7.36-7.80)      | 5.75 $\pm$ 1.37<br>(4.78-6.72)     | 74.77 $\pm$ 16.14<br>(63.36-86.19) | 49.93 $\pm$ 4.64<br>(46.65-53.22)     | 16.01 $\pm$ 2.38<br>(14.32-17.69)  |
| <i>H. californiensis</i> | 3   | 36.21 $\pm$ 8.75<br>(26.80-44.10)     | 75.75 $\pm$ 30.73<br>(41.38-100.58) | 76.48 $\pm$ 41.15<br>(30.18-108.86) | 55.14 $\pm$ 33.87<br>(21.30-89.05) | 71.24 $\pm$ 10.36<br>(61.20-81.89) | 147.69 $\pm$ 27.37<br>(118.97-173.47) | 30.34 $\pm$ 6.81<br>(22.74-35.90)  |
| <i>L. maculata</i>       | 5   | 46.67 $\pm$ 16.03<br>(24.38-62.81)    | 87.31 $\pm$ 35.98<br>(37.38-125.24) | 60.01 $\pm$ 31.58<br>(20.57-96.48)  | 49.34 $\pm$ 26.17<br>(16.18-82.51) | 82.37 $\pm$ 4.91<br>(78.35-89.44)  | 225.81 $\pm$ 47.13<br>(147.03-266.71) | 43.54 $\pm$ 10.45<br>(26.56-54.37) |
| <i>L. sulcata</i>        | 3   | 45.12 $\pm$ 5.50<br>(38.86-49.20)     | 31.99 $\pm$ 11.53<br>(21.34-44.24)  | 9.673 $\pm$ 4.56<br>(6.00-26.53)    | 7.01 $\pm$ 3.75<br>(3.84-11.16)    | 70.97 $\pm$ 6.13<br>(64.02-75.58)  | 158.13 $\pm$ 8.56<br>(152.01-167.91)  | 28.63 $\pm$ 3.45<br>(24.94-31.77)  |
| <i>S. empusa</i>         | 2   | 37.63 $\pm$ 2.04<br>(36.18-39.07)     | 28.57 $\pm$ 4.82<br>(25.16-31.98)   | 9.74 $\pm$ 3.29<br>(7.42-12.06)     | 5.72 $\pm$ 2.49<br>(3.96-7.48)     | 57.73 $\pm$ 5.98<br>(53.50-61.96)  | 97.41 $\pm$ 15.24<br>(86.63-108.18)   | 21.16 $\pm$ 3.87<br>(18.43-23.90)  |



Table 3. The ratios of spring parameters to merus length (ML) across species. Results are presented as mean  $\pm$  standard deviation. \*one individual was missing body size data. N is the number of individuals tested per species. When two appendages were tested per individual, those two values are averaged to form one value for that individual. Row colors indicate appendage type (smashers: white; undifferentiated: dark-gray; spearers: light-gray).

| Species                  | N   | Spring constant/ML (N mm <sup>-1</sup> ) | Max force/ML (N mm <sup>-1</sup> ) | Work: load/ML (mJ mm <sup>-1</sup> ) | Work: unload/ML (mJ mm <sup>-1</sup> ) | Resilience/ML (% mm <sup>-1</sup> ) |
|--------------------------|-----|------------------------------------------|------------------------------------|--------------------------------------|----------------------------------------|-------------------------------------|
| <i>G. falcatus</i>       | 18  | 5.02 $\pm$ 2.46                          | 1.80 $\pm$ 0.35                    | 0.37 $\pm$ 0.14                      | 0.27 $\pm$ 0.10                        | 5.51 $\pm$ 1.05                     |
| <i>G. chiragra</i>       | 10* | 2.90 $\pm$ 1.34                          | 1.94 $\pm$ 0.46                    | 0.64 $\pm$ 0.23                      | 0.49 $\pm$ 0.22                        | 4.15 $\pm$ 0.64                     |
| <i>G. smithii</i>        | 11  | 2.13 $\pm$ 0.81                          | 2.15 $\pm$ 0.54                    | 0.90 $\pm$ 0.30                      | 0.70 $\pm$ 0.25                        | 4.24 $\pm$ 0.50                     |
| <i>N. bredini</i>        | 1   | 2.25                                     | 1.67                               | 0.47                                 | 0.36                                   | 6.41                                |
| <i>N. festae</i>         | 1   | 3.27                                     | 1.65                               | 0.35                                 | 0.29                                   | 7.55                                |
| <i>N. oerstedii</i>      | 6   | 2.63 $\pm$ 1.33                          | 1.60 $\pm$ 0.85                    | 0.47 $\pm$ 0.25                      | 0.33 $\pm$ 0.17                        | 4.97 $\pm$ 0.77                     |
| <i>N. wennerae</i>       | 2   | 2.74 $\pm$ 0.43                          | 1.69 $\pm$ 0.23                    | 0.48 $\pm$ 0.05                      | 0.36 $\pm$ 0.03                        | 4.65 $\pm$ 0.32                     |
| <i>H. californiensis</i> | 3   | 1.20 $\pm$ 0.16                          | 2.42 $\pm$ 0.53                    | 2.38 $\pm$ 0.92                      | 1.71 $\pm$ 0.77                        | 2.43 $\pm$ 0.62                     |
| <i>L. maculata</i>       | 5   | 1.05 $\pm$ 0.16                          | 1.94 $\pm$ 0.51                    | 1.31 $\pm$ 0.52                      | 1.08 $\pm$ 0.44                        | 2.00 $\pm$ 0.58                     |
| <i>L. sulcata</i>        | 3   | 1.60 $\pm$ 0.34                          | 1.14 $\pm$ 0.43                    | 0.34 $\pm$ 0.16                      | 0.25 $\pm$ 0.13                        | 2.52 $\pm$ 0.47                     |
| <i>S. empusa</i>         | 2   | 1.82 $\pm$ 0.43                          | 1.35 $\pm$ 0.02                    | 0.45 $\pm$ 0.07                      | 0.26 $\pm$ 0.07                        | 2.75 $\pm$ 0.22                     |

Table 4. The relationships between merus length as the independent variable and spring characteristics as the dependent variables across species, calculated using Phylogenetic Generalized Least Squares with mean species values. The statistical results apply to the coefficient. None of the intercepts are significantly different from zero, except for resilience ( $t=13.043$ ,  $p=0.0000$ ). Statistically significant values are indicated in bold. The results of using the combined males and females dataset are presented here; males only and females only datasets yield qualitatively similar results with the exception of resilience in females ( $\lambda =1$  ; intercept: 60.7; coeff.: 0.71; std.err.: 0.15;  $p=0.0045$  ).  $\lambda$  represents phylogenetic correlation ranging from 0 (no phylogenetic signal) to 1 (Brownian motion) (Freckleton et al., 2002; Pagel, 1999).  $\lambda$  is 0 for the data shown here.

|                                            | Intercept     | Coefficient | Standard error | t-value       | P-value       |
|--------------------------------------------|---------------|-------------|----------------|---------------|---------------|
| <b>Spring constant (N mm<sup>-1</sup>)</b> | 37.93         | 0.17        | 0.39           | 0.4403        | 0.6713        |
| <b>Maximum force (N)</b>                   | <b>-6.17</b>  | <b>2.09</b> | <b>0.36</b>    | <b>5.8498</b> | <b>0.0004</b> |
| <b>Work: load (mJ)</b>                     | <b>-21.69</b> | <b>1.97</b> | <b>0.53</b>    | <b>3.6819</b> | <b>0.0062</b> |
| <b>Work: unload (mJ)</b>                   | <b>-17.87</b> | <b>1.56</b> | <b>0.39</b>    | <b>4.0265</b> | <b>0.0038</b> |
| <b>Resilience (%)</b>                      | 70.68         | 0.11        | 0.24           | 0.4758        | 0.6470        |

Table 5. The scaling of spring characteristics relative to merus length within each species using a least-squares linear regression. Statistically significant values are indicated in bold. *L. maculata* (gray) is a spearer; the remaining species are smashers.

|                                            | Species          | Intercept     | Slope        | F-statistic  | df          | P-value       | R <sup>2</sup> |
|--------------------------------------------|------------------|---------------|--------------|--------------|-------------|---------------|----------------|
| <b>Spring constant (N mm<sup>-1</sup>)</b> | <i>falcatus</i>  | <b>121.35</b> | <b>-4.11</b> | <b>5.14</b>  | <b>1,16</b> | <b>0.0376</b> | <b>0.2431</b>  |
|                                            | <i>chiragra</i>  | <b>176.66</b> | <b>-7.07</b> | <b>13.74</b> | <b>1,7</b>  | <b>0.0076</b> | <b>0.6625</b>  |
|                                            | <i>smithii</i>   | 88.33         | -2.68        | 0.79         | 1,9         | 0.3960        | 0.0811         |
|                                            | <i>oerstedii</i> | 84.73         | -3.49        | 1.01         | 1,4         | 0.3713        | 0.2019         |
|                                            | <i>maculata</i>  | <b>-15.68</b> | <b>1.43</b>  | <b>20.24</b> | <b>1,3</b>  | <b>0.0205</b> | <b>0.8709</b>  |
| <b>Maximum force (N)</b>                   | <i>falcatus</i>  | <b>-4.37</b>  | <b>2.12</b>  | <b>19.59</b> | <b>1,16</b> | <b>0.0004</b> | <b>0.5504</b>  |
|                                            | <i>chiragra</i>  | 41.92         | -0.42        | 0.15         | 1,7         | 0.7134        | 0.0205         |
|                                            | <i>smithii</i>   | -24.45        | 3.48         | 2.67         | 1,9         | 0.1364        | 0.2291         |
|                                            | <i>oerstedii</i> | 38.90         | -1.21        | 0.24         | 1,4         | 0.6517        | 0.0560         |
|                                            | <i>maculata</i>  | <b>-41.03</b> | <b>2.95</b>  | <b>8.23</b>  | <b>1,3</b>  | <b>0.0642</b> | <b>0.7327</b>  |
| <b>Work: load (mJ)</b>                     | <i>falcatus</i>  | <b>-7.90</b>  | <b>0.96</b>  | <b>43.27</b> | <b>1,16</b> | <b>0.0000</b> | <b>0.7301</b>  |
|                                            | <i>chiragra</i>  | -9.71         | 1.19         | 3.69         | 1,7         | 0.0964        | 0.3449         |
|                                            | <i>smithii</i>   | <b>-35.54</b> | <b>2.84</b>  | <b>7.16</b>  | <b>1,9</b>  | <b>0.0254</b> | <b>0.4429</b>  |
|                                            | <i>oerstedii</i> | 6.92          | -0.03        | 0.00         | 1,4         | 0.9708        | 0.0004         |
|                                            | <i>maculata</i>  | <b>-47.59</b> | <b>2.47</b>  | <b>6.05</b>  | <b>1,3</b>  | <b>0.0908</b> | <b>0.6686</b>  |
| <b>Work: unload (mJ)</b>                   | <i>falcatus</i>  | <b>-5.58</b>  | <b>0.69</b>  | <b>43.45</b> | <b>1,16</b> | <b>0.0000</b> | <b>0.7309</b>  |
|                                            | <i>chiragra</i>  | -12.17        | 1.17         | 4.06         | 1,7         | 0.0836        | 0.3673         |
|                                            | <i>smithii</i>   | <b>-34.76</b> | <b>2.60</b>  | <b>9.00</b>  | <b>1,9</b>  | <b>0.0150</b> | <b>0.4999</b>  |
|                                            | <i>oerstedii</i> | 2.56          | 0.14         | 0.06         | 1,4         | 0.8162        | 0.0152         |
|                                            | <i>maculata</i>  | <b>-38.09</b> | <b>2.01</b>  | <b>5.39</b>  | <b>1,3</b>  | <b>0.1028</b> | <b>0.6426</b>  |
| <b>Resilience (%)</b>                      | <i>falcatus</i>  | 73.27         | 0.02         | 0.00         | 1,16        | 0.9713        | 0.0001         |
|                                            | <i>chiragra</i>  | 34.19         | 2.22         | 1.61         | 1,7         | 0.2446        | 0.1873         |
|                                            | <i>smithii</i>   | 52.04         | 1.40         | 0.57         | 1,9         | 0.4712        | 0.0591         |
|                                            | <i>oerstedii</i> | 46.73         | 1.60         | 0.54         | 1,4         | 0.5028        | 0.1191         |
|                                            | <i>maculata</i>  | 79.92         | 0.06         | 0.04         | 1,3         | 0.8479        | 0.0143         |

Table 6. The effects of cutting the saddle on spring characteristics across species. Paired t-tests were performed, except when data were not normally distributed. \*In this latter case, a paired Wilcoxon signed rank test was performed (indicated by “V=”) in the t-value column. Statistically significant values are indicated in bold. *L. maculata* is a spearer (gray); the remaining species are smashers.

|                                       | Species          | t-value*       | df        | P-value       | Mean of differences |
|---------------------------------------|------------------|----------------|-----------|---------------|---------------------|
| Spring constant (N mm <sup>-1</sup> ) | <i>falcatus</i>  | <b>4.2373</b>  | <b>13</b> | <b>0.0010</b> | <b>4.45</b>         |
|                                       | <i>chiragra</i>  | 0.6211         | 9         | 0.5499        | 1.07                |
|                                       | <i>smithii</i>   | -1.2008        | 10        | 0.2575        | -1.18               |
|                                       | <i>oerstedii</i> | 1.3386         | 5         | 0.2383        | 8.01                |
|                                       | <i>maculata</i>  | -1.7609        | 3         | 0.1765        | -14.25              |
| Maximum force (N)                     | <i>falcatus</i>  | <b>8.0989</b>  | <b>13</b> | <b>0.0000</b> | <b>3.60</b>         |
|                                       | <i>chiragra</i>  | <b>6.1219</b>  | <b>9</b>  | <b>0.0002</b> | <b>5.31</b>         |
|                                       | <i>smithii</i>   | <b>V = 61</b>  |           | <b>0.0098</b> | <b>4.23</b>         |
|                                       | <i>oerstedii</i> | 1.7444         | 5         | 0.1415        | 6.46                |
|                                       | <i>maculata</i>  | V = 1          |           | 0.2500        | -32.05              |
| Work: load (mJ)                       | <i>falcatus</i>  | <b>5.6182</b>  | <b>13</b> | <b>0.0001</b> | <b>0.99</b>         |
|                                       | <i>chiragra</i>  | <b>4.6379</b>  | <b>9</b>  | <b>0.0012</b> | <b>2.38</b>         |
|                                       | <i>smithii</i>   | <b>3.413</b>   | <b>10</b> | <b>0.0066</b> | <b>2.37</b>         |
|                                       | <i>oerstedii</i> | 1.9583         | 5         | 0.1075        | 1.96                |
|                                       | <i>maculata</i>  | -2.1381        | 3         | 0.1221        | -21.75              |
| Work: unload (mJ)                     | <i>falcatus</i>  | <b>4.5751</b>  | <b>13</b> | <b>0.0005</b> | <b>0.59</b>         |
|                                       | <i>chiragra</i>  | <b>4.0228</b>  | <b>9</b>  | <b>0.0030</b> | <b>1.58</b>         |
|                                       | <i>smithii</i>   | <b>2.9778</b>  | <b>10</b> | <b>0.0139</b> | <b>1.84</b>         |
|                                       | <i>oerstedii</i> | 1.8299         | 5         | 0.1268        | 1.24                |
|                                       | <i>maculata</i>  | -2.0155        | 3         | 0.1372        | -18.06              |
| Resilience (%)                        | <i>falcatus</i>  | <b>-3.7337</b> | <b>13</b> | <b>0.0025</b> | <b>-2.57</b>        |
|                                       | <i>chiragra</i>  | <b>-3.2098</b> | <b>9</b>  | <b>0.0107</b> | <b>-1.98</b>        |
|                                       | <i>smithii</i>   | -0.3516        | 10        | 0.7324        | -0.53               |
|                                       | <i>oerstedii</i> | -1.8154        | 5         | 0.1292        | -2.79               |
|                                       | <i>maculata</i>  | 0.2508         | 3         | 0.8182        | 0.37                |

Table 7. Percent change in spring parameter after the saddle was severed; negative values indicate a decrease after the saddle was cut. Individual values were calculated and then averaged to generate species means. Row colors indicate appendage type (smashers: white; undifferentiated: dark-gray; spearers: light-gray).

| <b>Species</b>        | <b>n</b> | <b>Spring constant</b> | <b>Maximum force</b> | <b>Work: load</b> | <b>Work: unload</b> | <b>Resilience</b> |
|-----------------------|----------|------------------------|----------------------|-------------------|---------------------|-------------------|
| <i>falcatus</i>       | 14       | -6.5                   | -13.4                | -15.8             | -12.7               | 3.6               |
| <i>chiragra</i>       | 9        | -0.4                   | -16.4                | -21.3             | -19.4               | 2.5               |
| <i>smithii</i>        | 11       | 4.0                    | -10.0                | -13.3             | -12.6               | 0.8               |
| <i>bredini</i>        | 1        | -3.2                   | -23.1                | -27.5             | -27.0               | 0.5               |
| <i>festae</i>         | 1        | 6.0                    | -15.8                | -21.0             | -22.4               | -1.7              |
| <i>oerstedii</i>      | 6        | -13.5                  | -21.8                | -24.3             | -20.1               | 4.6               |
| <i>wennerae</i>       | 2        | -15.5                  | -7.7                 | -0.7              | 8.4                 | 8.9               |
| <i>californiensis</i> | 1        | -17.1                  | -21.5                | -21.0             | -18.9               | 2.6               |
| <i>maculata</i>       | 4        | -27.7                  | -35.0                | -34.7             | -34.3               | 0.5               |
| <i>sulcata</i>        | 1        | -38.6                  | -20.3                | -1.3              | -1.5                | -0.4              |
| <i>empusa</i>         | 2        | -33.5                  | -30.1                | -28.1             | -19.5               | 11.7              |



Table 8. The scaling of spring characteristics relative to merus length in two different datasets - one including only species with spears and the other consisting of species with hammers. The analyses were calculated using Phylogenetic Generalized Least Squares with mean species values. The statistical results apply to the coefficient. None of the intercepts are significantly different from zero, except for the spring constant in spears (t=6.23, p=0.0248) and resilience in species with hammers (t=8.08, p=0.0013).  $\lambda$  represents phylogenetic correlation ranging from 0 (no phylogenetic signal) to 1 (Brownian motion) (Freckleton et al., 2002; Pagel, 1999). Assumptions were violated for the resilience calculation in spears, so those values are not included. Row colors indicate appendage type (smashers: white; spears: light-gray). Statistically significant values are indicated in bold.

|                                                 | Intercept     | Coefficient | Standard error | t-value     | P-value       | $\lambda$ |
|-------------------------------------------------|---------------|-------------|----------------|-------------|---------------|-----------|
| <b>Spring constant</b><br>(N mm <sup>-1</sup> ) | 33.23         | 0.51        | 1.98           | 0.26        | 0.8083        | 1         |
|                                                 | 27.47         | 0.40        | 0.09           | 4.26        | 0.0509        | 1         |
| <b>Maximum force (N)</b>                        | <b>-14.58</b> | <b>2.77</b> | <b>0.46</b>    | <b>6.01</b> | <b>0.0039</b> | <b>0</b>  |
|                                                 | <b>-18.58</b> | <b>2.65</b> | <b>0.37</b>    | <b>7.07</b> | <b>0.0194</b> | <b>1</b>  |
| <b>Work: load (mJ)</b>                          | <b>-13.78</b> | <b>1.48</b> | <b>0.40</b>    | <b>3.73</b> | <b>0.0203</b> | <b>0</b>  |
|                                                 | -16.28        | 2.27        | 0.58           | 3.89        | 0.0602        | 1         |
| <b>Work: unload (mJ)</b>                        | <b>-11.16</b> | <b>1.17</b> | <b>0.33</b>    | <b>3.52</b> | <b>0.0244</b> | <b>0</b>  |
|                                                 | <b>-21.36</b> | <b>1.97</b> | <b>0.42</b>    | <b>4.73</b> | <b>0.0419</b> | <b>1</b>  |
| <b>Resilience (%)</b>                           | 72.94         | 0.11        | 0.59           | 0.19        | 0.8574        | 0         |
|                                                 | na            | na          | na             | na          | na            | na        |
